1 Protease-activatable biosensors of SARS-CoV-2 infection for cell-  
2 based drug, neutralisation and virological assays

3

4 Pehuén Pereyra Gerber<sup>1,2</sup>, Lidia M Duncan<sup>1,2</sup>, Edward JD Greenwood<sup>1,2</sup>, Sara Marelli<sup>1,2</sup>, Adi  
5 Naamati<sup>1,2</sup>, Ana Teixeira-Silva<sup>1,2</sup>, Thomas WM Crozier<sup>1,2</sup>, Ildar Gabaev<sup>1,2</sup>, Jun R Zhan<sup>1,2</sup>, Anna  
6 V Protasio<sup>3</sup>, Nicholas J Matheson<sup>1,2,4,\*</sup>

7

8 1. Department of Medicine, University of Cambridge, UK

9 2. Cambridge Institute for Therapeutic Immunology and Infectious Disease (CITIID), Jeffrey  
10 Cheah Biomedical Centre, University of Cambridge, UK

11 3. Department of Pathology, University of Cambridge, UK

12 4. NHS Blood and Transplant, Cambridge, UK

13

14 \*Correspondence: [njm25@cam.ac.uk](mailto:njm25@cam.ac.uk)

## 15 **Abstract**

16 The world is in the grip of a severe acute respiratory syndrome coronavirus 2 (SARS-CoV-2)  
17 pandemic, and there is an urgent unmet clinical need for effective antiviral therapies. Many  
18 inhibitors of viral enzymes identified *in vitro* have limited efficacy against viral replication in  
19 cells, but conventional plaque assays are impractical for high-throughput screens. In this  
20 study, we therefore engineer cell-based biosensors of SARS-CoV-2 infection. Our assays  
21 exploit the cleavage of specific oligopeptide linkers by SARS-CoV-2 Main or Papain-like  
22 proteases, leading to the activation of green fluorescent protein (GFP) or firefly luciferase-  
23 based reporters. First, we characterise these biosensors in cells using recombinant viral  
24 proteases. Next, we confirm their ability to detect endogenous viral protease expression during  
25 infection with wildtype SARS-CoV-2. Finally, we develop a sensitive luminescent reporter cell  
26 line, confirm that it accurately quantitates infectious SARS-CoV-2 virus, and demonstrate its  
27 utility for drug screening and titration of neutralising antibodies.

## 28 Introduction

29 Since its emergence in December 2019, SARS-CoV-2 has caused more than 100 million  
30 cases of coronavirus disease 2019 (COVID-19) and over 2 million deaths worldwide  
31 (<https://ourworldindata.org/> [Online Resource]). Together with SARS-CoV and Middle East  
32 respiratory syndrome coronavirus (MERS-CoV), it is the third betacoronavirus to cause a  
33 large-scale human outbreak in the last two decades (V'Kovski et al., 2020). Even with effective  
34 vaccines, it is very likely that SARS-CoV-2 will continue to circulate and cause disease for the  
35 foreseeable future in at least some parts of the world (Phillips, 2021). The most promising  
36 direct-acting antiviral agent currently in the clinic is the RNA-dependent RNA polymerase  
37 inhibitor remdesivir, but it must be administered by intravenous infusion, and clinical trials have  
38 generated mixed results (Harrington et al., 2021). Research is therefore urgently required to  
39 identify and trial novel antiviral therapies against SARS-CoV-2 (Matheson and Lehner, 2020),  
40 as well as MERS-CoV and (potentially) future zoonotic coronaviruses.

41 Whilst direct, biochemical assays are commonly used for targeted drug discovery, the activity  
42 of small molecules *in vitro* often fails to translate to a cellular or *in vivo* context, because of  
43 factors such as membrane permeability, off-target effects and cytotoxicity (An and Tolliday,  
44 2010). Cell-based assays have the potential to provide more physiologically relevant  
45 information, and allow the study of complex tertiary phenotypes such as viral replication. In  
46 fact, cell-based optical reporter systems have been instrumental in the development of antiviral  
47 therapies to combat a previous global pandemic, caused by human immunodeficiency virus-  
48 1 (HIV-1). Commensurate with this, more than a thousand publications have cited the  
49 luminescent and colorimetric HIV-1 reporter cell line TZM-bl (Wei et al., 2002), and over 700  
50 have cited the fluorescent J-Lat model of HIV-1 latency (Jordan et al., 2003). These  
51 approaches have facilitated a wealth of fundamental research on retrovirology, and luciferase-  
52 based neutralisation assays in TZM-bl cells are used worldwide for the assessment of vaccine-  
53 elicited neutralising antibodies, monoclonal antibodies and the neutralising antibody response  
54 in HIV-1 infection (Sarzotti-Kelsoe et al., 2014).

55 Unlike HIV-1, relatively few tools are available to facilitate work with SARS-CoV-2.  
56 Conventional plaque reduction neutralisation tests (PRNT) remain the gold standard for  
57 quantification of viral replication, but the low throughput and long turnaround time of these  
58 assays limit their utility for large-scale screening of drugs or sera. Whilst fluorescent (Xie et  
59 al., 2020a) and luminescent (Xie et al., 2020b) SARS-CoV-2 reporter viruses have recently  
60 been described, the reconstruction and reverse genetic modification of full-length SARS-CoV-  
61 2 is laborious, and these approaches are therefore currently restricted to re-engineered  
62 reference strains, not emerging variants of concern (Walensky et al., 2021; Williams and  
63 Burgers, 2021). Likewise, lentiviral or vesicular stomatitis virus particles pseudotyped with the  
64 spike protein of SARS-CoV-2 may be substituted in some settings (Hyseni et al., 2020; Nie et  
65 al., 2020), but these assays are typically not standardised between laboratories, are only  
66 applicable to studies of viral entry, and correlate imperfectly with assays using authentic virus  
67 (Donal et al., 2021; Mishra et al., 2021). There is therefore an urgent unmet need for a simple,  
68 high-throughput cell-based assay, to quantitate authentic SARS-CoV-2 infection, including  
69 new clinical variants.

70 During the SARS-CoV-2 replication cycle, the 30 kb single-stranded positive-sense genomic  
71 RNA is used as a template to generate the polyproteins 1a and 1ab (pp1a and pp1ab). In turn,  
72 these polyproteins are processed into the 16 non-structural proteins (nsp1 to nsp16) by the  
73 action of two virally-encoded proteases on sequence-specific cleavage sites: the Papain-like  
74 Protease (PLPro or nsp3) and the Main or 3C-like Protease (MPro or nsp5) (Chen et al., 2020).  
75 Inhibitors of SARS-CoV-2 proteases are therefore candidate antiviral therapeutics (Jin et al.,  
76 2020b; Kneller et al., 2020; Ma et al., 2020; Shin et al., 2020; Vuong et al., 2020). Additionally,  
77 viral protease activity may be exploited for cell-based assays, through the use of protease-  
78 activatable biosensors. These assays typically depend on the cleavage of specific  
79 oligopeptide linkers, leading to the activation of fluorescent or luminescent reporter proteins.  
80 They have hitherto been used for the detection of over-expressed, recombinant proteases  
81 from diverse viruses including HIV-1, HCV, DENV-1, and MERS-CoV (Arias-Arias et al., 2020;



82 Kilianski et al., 2013; Lindsten et al., 2001; Sabariego et al., 2009), but not endogenous viral  
83 protease expression during authentic infection.

84 In this study, we aim to exploit the presence of viral protease activity for the detection of  
85 authentic SARS-CoV-2 infection. We therefore generate protease-activatable fluorescent and  
86 luminescent biosensors for SARS-CoV-2 MPro and PLPro activity, one based on “flip” GFP  
87 (FlipGFP) (Zhang et al., 2019), and the other based on circularly permuted firefly luciferase  
88 (FFluc) (Wigdal et al., 2008). Having confirmed the specificity and utility of these reporters  
89 using recombinant viral proteases, we establish their ability to detect and quantitate infected  
90 cells. Finally, we develop a stable, luminescent reporter cell line, in which FFluc is activated  
91 by PLPro expression during SARS-CoV-2 infection. We demonstrate the utility of these cells  
92 in assays of small molecule antivirals and neutralising antibodies using a wildtype SARS-CoV-  
93 2 isolate.

## 94 **Results**

### 95 **Generation of FlipGFP-based SARS-CoV-2 protease reporters**

96 The FlipGFP reporter comprises a split, superfolder eGFP molecule in which the last two beta-  
97 sheets (10 and 11) are held in an inactive, parallel orientation by the coiled-coil domains K5  
98 and E5 and a protease-cleavable oligopeptide linker (Zhang et al., 2019). After cleavage of  
99 this linker, the beta-sheets adopt an anti-parallel orientation and self-assemble with beta-  
100 sheets 1-9, restoring GFP fluorescence (**Figure 1A**).

101 To generate SARS-CoV-2 protease reporters, we replaced a tobacco etch virus (TEV)  
102 protease cleavage site present in the original FlipGFP oligopeptide linker with candidate MPro  
103 or PLPro cleavage sites from the pp1a polyprotein of SARS-CoV-2 (**Figure 1B**). For MPro, we  
104 selected a wildtype self-cleavage sequence (SAVLQ/SGF, herein termed WT3c) present  
105 between nsp4 and nsp5, and an “optimal” cleavage sequence (TVRLQ/SGF, herein termed  
106 Opt3c) found by substrate profiling of SARS-CoV MPro (Chuck et al., 2010), and subsequently  
107 validated for SARS-CoV-2 MPro (Wioletta Rut, BiorXiv). For PLPro, we selected all three  
108 cognate cleavage sequences present in the pp1a polyprotein (ELNGG/AYT, herein termed  
109 PLP1; TLKGG/APT, herein termed PLP2; and ALKGG/KIV, herein termed PLP3). Importantly,  
110 all the wildtype sequences tested are highly conserved amongst SARS-CoV-2 and SARS-  
111 CoV viral isolates (**Figure 1–figure supplement 1A**).

### 112 **Detection of recombinant SARS-CoV-2 protease activity in cells**

113 To test whether these biosensors could detect SARS-CoV-2 protease activity in cells, we co-  
114 transfected them with blue fluorescent protein (BFP) plus/minus their cognate SARS-CoV-2  
115 protease into HEK293T cells, and analysed FlipGFP fluorescence after 24 h by flow cytometry  
116 (**Figure 1C-F** and **Figure 1–figure supplement 2A**). To control for background FlipGFP  
117 fluorescence, mCherry was co-expressed with FlipGFP using a T2A peptide linker, and the  
118 ratio of FlipGFP/mCherry fluorescence in BFP+ (transfected) cells used to quantitate reporter  
119 activation. Background FlipGFP fluorescence required both parts of the split FlipGFP molecule

120 (beta-sheets 1-9 and 10/11), and may therefore reflect non-specific cleavage of the FlipGFP  
121 oligopeptide linker, or assembly of trimeric complexes, with antiparallel beta-sheets 10 and 11  
122 supplied by separate molecules (**Figure 1–figure supplement 2B**).

123 Both WT3c-FlipGFP and Opt3c-FlipGFP reporters showed a marked increase in FlipGFP  
124 fluorescence in the presence of MPro (**Figure 1C-D**), comparable to the increase seen with  
125 the established FlipGFP/TEV protease reporter (**Figure 1–figure supplement 3A-B**). All  
126 three PLPro reporters showed an increase in FlipGFP fluorescence in the presence of the  
127 PLPro catalytic domain (PLPro c.d.), with the strongest signal from the PLP2-FlipGFP reporter  
128 (**Figure 1E-F**). We therefore selected the Opt3c-FlipGFP (MPro) and PLP2-FlipGFP (PLPro)  
129 biosensors for further evaluation. To optimise the dynamic range of the flow cytometric assay,  
130 we titrated the amount of protease and FlipGFP plasmids, and determined the optimal interval  
131 for analysis post-transfection (**Figure 1–figure supplement 2C-E**). We also observed similar  
132 results using epifluorescence microscopy (**Figure 1G**).

### 133 **Confirmation of SARS-CoV-2 protease reporter specificity**

134 To evaluate the specificity of the selected biosensors for their cognate protease, we used the  
135 same co-transfection assay in HEK293Ts to measure Opt3c-FlipGFP, PLP2-FlipGFP and  
136 TEV-FlipGFP reporter activation in pair-wise combination with MPro, PLPro c.d., or TEV  
137 protease (**Figure 1–figure supplement 3A-B**). As a further check, we generated non-  
138 cleavable mutants of the Opt3c-FlipGFP and PLP2-FlipGFP reporters. For the Opt3c-FlipGFP  
139 reporter, a critical glutamine residue present in the cleavage site was mutated to isoleucine.  
140 For the PLP2-FlipGFP reporter, the critical LKGG sequence was scrambled to GLGK. Neither  
141 of these non-cleavable mutants showed an increase in FlipGFP fluorescence in the presence  
142 of its cognate protease (**Figure 1–figure supplement 3C-F**). Taken together, these results  
143 confirm that the selected SARS-CoV-2 biosensors are specific for their cognate proteases,  
144 and activated in a strictly sequence-dependent manner.

### 145 **A cell-based fluorescent assay for inhibitors of MPro activity**

146 To test the utility of FlipGFP-based reporters for screening antiviral compounds in cell-based  
147 assays, we focused on the Opt3c-FlipGFP reporter. As positive controls, we first tested GC373  
148 and its pro-drug GC376, which have been reported to inhibit both SARS-CoV and SARS-CoV-  
149 2 MPro activity *in vitro*, and viral replication in cells (Kim et al., 2012; Ma et al., 2020;  
150 Rathnayake et al., 2020). As expected, a clear dose-dependent decrease in Opt3C-FlipGFP  
151 fluorescence was observed in the presence of recombinant MPro and increasing  
152 concentrations of either drug (**Figure 2A-C**). Conversely, GC373 did not inhibit PLP2-FlipGFP  
153 or TEV-FlipGFP activation by PLPro c.d or TEV protease, respectively (**Figure 2D-G**).

154 Next, we evaluated a panel of compounds previously reported to have activity against MPro  
155 *in vitro*, but which failed to inhibit viral replication in cells (Jin et al., 2020a). In each case, we  
156 used the highest concentration tolerated by HEK293Ts for 24 h. Unlike GC373 and GC376,  
157 none of these compounds inhibited MPro activity in cells (**Figure 2–figure supplement 1A**).  
158 Finally, we tested the HIV-1 protease inhibitors lopinavir and ritonavir (**Figure 2–figure**  
159 **supplement 1B**). These compounds have been reported to have variable activity against  
160 MPro activity *in vitro*, but have failed to improve outcomes in clinical trials (Cao et al., 2020;  
161 Horby et al., 2020; WHO, 2020). They marginally inhibited MPro activity in cells, but only when  
162 used at high doses, sufficient to impact transfection efficiency, reflected by a decreased  
163 number of BFP+ cells (**Figure 2–figure supplement 1C**). In summary, these data support the  
164 principle that cell-based assays for antiviral compounds correlate better with activity against  
165 viral replication than *in vitro* assays.

### 166 **Activation of FlipGFP-based reporters by wildtype SARS-CoV-2 infection**

167 To test whether our FlipGFP-based reporters could be activated by viral protease expression  
168 during SARS-CoV-2 infection, we made use of a permissive HEK293T cell line over-  
169 expressing ACE2 (Hoffmann et al., 2020) and furin (Papa et al., 2020), herein termed  
170 HEK293T-ACE2 cells. These cells are both readily transfectable with reporter constructs, and  
171 demonstrate clear cytopathic effect after 24 h SARS-CoV-2 infection, including the formation  
172 of large syncytia (**Figure 3–figure supplement 1A**). Since spike-positive syncytia are lost

173 during flow cytometric analysis (**Figure 3–figure supplement 1B-C**), we instead used  
174 fluorescent microscopy to analyse changes in FlipGFP fluorescence during SARS-CoV-2  
175 infection.

176 Accordingly, HEK293T-ACE2 cells were plated in chambered coverslips, transfected with the  
177 indicated reporter constructs, then infected after 12 h with SARS-CoV-2. After a further 24 h  
178 incubation, reporter activation was quantitated as the ratio of FlipGFP/mCherry fluorescence  
179 in spike-positive syncytia, compared with uninfected cells. As expected, we observed a  
180 consistent increase in FlipGFP fluorescence in infected cells transfected with either the Opt3c-  
181 FlipGFP or PLP2-FlipGFP reporter, but not infected cells transfected with non-cleavable  
182 controls (**Figure 3A-B**).

183 Whilst confirming that our FlipGFP reporters could be activated by SARS-CoV-2 infection, the  
184 magnitude of effect was, however, markedly reduced compared with the over-expression of  
185 recombinant viral proteases (compare **Figure 1D** and **Figure 1F** with **Figure 3B**). This likely  
186 reflects lower levels of protease expression during viral infection, compared with over-  
187 expression of recombinant proteases (**Figure 3C**). In addition, it is possible that the  
188 localisation of proteases and/or presence of other viral proteins and endogenous polyprotein  
189 substrates during authentic viral infection reduces their likelihood of encountering reporter  
190 molecules. Taken together, these data provided proof-of-concept that protease-activatable  
191 biosensors may be exploited to signal SARS-CoV-2 infection, but failed to demonstrate a  
192 usable window for high-throughput experiments.

### 193 **Generation of luciferase-based SARS-CoV-2 protease reporters**

194 To amplify the signal from viral protease expression during SARS-CoV-2 infection, we next  
195 developed a luciferase-based system. The 30F-GloSensor reporter comprises an inactive,  
196 circularly permuted firefly luciferase (FFluc) molecule (Wigdal et al., 2008). Cleavage of a  
197 protease-sensitive oligopeptide linker leads to a conformational change which markedly  
198 increases luminescence (**Figure 4A**). Co-expression with Renilla luciferase (Rluc) from the

199 same vector allows expression levels and cell viability to be normalised between conditions.  
200 Similar reporters have previously been used to detect overexpressed MERS-CoV MPro in cell-  
201 based assays (Kilianski et al., 2013).

202 To detect SARS-CoV-2 protease activity, we generated 30F-GloSensor constructs with the  
203 same sequence-specific oligopeptide linkers as our FlipGFP-based reporters: 30F-Opt3c,  
204 non-cleavable 30F-Opt3c, 30F-PLP2, and non-cleavable 30F-PLP2. Next, we co-transfected  
205 them with/without their cognate SARS-CoV-2 protease into HEK293T cells, and analysed  
206 FFluc and Rluc luminescence after 24 h (**Figure 4B-C**). As expected, Rluc luminescence was  
207 comparable across all conditions, reflecting similar transfection efficiency. Conversely, FFluc  
208 luminescence increased dramatically in the presence of cognate SARS-CoV-2 protease.  
209 Normalising for Rluc luminescence, we observed a 139-fold increase in luminescence for the  
210 30F-Opt3c/MPro reporter, and a 74-fold increase with the 30F-PLP2/PLPro reporter.  
211 Conversely, no increase in signal was seen with the non-cleavable controls. As an additional  
212 control, when the reporters were co-transfected pair-wise with non-cognate proteases, no  
213 increase in signal was observed (**Figure 4D**).

#### 214 **Quantitation of SARS-CoV-2 infection using luciferase-based reporters**

215 To test whether our luciferase-based reporters could be activated by SARS-CoV-2 infection,  
216 we transfected HEK293T-ACE2 cells with the indicated reporter constructs, then infected after  
217 12 h with SARS-CoV-2. After a further 24 h incubation, reporter activation was quantitated as  
218 the ratio of FFluc/Rluc luminescence. Compared with uninfected cells, we observed a marked  
219 increase in FFluc luminescence in infected cells transfected with either the 30F-Opt3 or 30F-  
220 PLP2 reporter, but not infected cells transfected with non-cleavable controls (**Figure 5A-B**).  
221 In the context of viral infection, the 30F-PLP2 reporter showed a better dynamic range (29-  
222 fold increase in luminescence) than the 30F-Opt3c reporter (9.3-fold increase in  
223 luminescence). As expected based on sequence conservation (**Figure 1-figure supplement**  
224 **1A**), it was also readily activated by recombinant PLPro of SARS-CoV, as well as SARS-CoV-

225 **2 (Figure 1–figure supplement 1B)**. We therefore selected the 30F-PLP2 reporter for further  
226 validation in assays for SARS-CoV-2 infection.

227 To determine how closely the luciferase signal correlated with the number of infected cells,  
228 we titrated a SARS-CoV-2 viral stock in HEK293T-ACE2 cells, and measured FFluc and Rluc  
229 luminescence in parallel with determining the proportion of spike-positive infected cells using  
230 automated microscopy (Cellomics). As expected, the proportion of infected cells increased in  
231 accordance with the amount of virus (**Figure 5C-D**). This proportion was mirrored by the  
232 luciferase signal (**Figure 5E**), with a correlation coefficient ( $R^2$ ) of 0.93 (**Figure 5F**). Our 30F-  
233 PLP2 reporter therefore allows the quantitation of wild-type SARS-CoV-2 replication, using a  
234 facile luminescent assay.

### 235 **A facile luminescent assay for inhibitors of SARS-CoV-2 replication**

236 To test the utility of our luminescent assay for screening candidate antiviral compounds, we  
237 transfected HEK293T-ACE2 cells with the 30F-PLP2 reporter 11 h before treatment with  
238 remdesivir, GC376, favipiravir, lopinavir or DMSO. After a further 1 h, cells were infected with  
239 wildtype SARS-CoV-2 virus and incubated for an additional 24 h before measurement of FFluc  
240 and Rluc activities (**Figure 6A**). Similar to published data (Ma et al., 2020; Simonis et al., 2021;  
241 Vuong et al., 2020), these experiments allowed us to readily distinguish two antiviral  
242 compounds that completely abrogated SARS-COV-2 replication (remdesivir and GC376) from  
243 two that did not (favipiravir and lopinavir) (**Figure 6B**).  $IC_{50}$  concentrations for remdesivir and  
244 GC376 were in the low nanomolar range, corresponding to results from plaque reduction  
245 neutralisation tests (PRNT) in other recent studies (Ma et al., 2020; Vuong et al., 2020; Wang  
246 et al., 2020). Importantly, since the signal from the 30F-PLP2 reporter was inhibited by  
247 remdesivir and GC376, neither of which directly targets PLPro, reporter activation must  
248 genuinely reflect viral replication.

### 249 **A sensitive luminescent reporter cell line for drug, neutralisation and general** 250 **virological assays**

251 To simplify our assay and adapt it for high-throughput screening, we next generated a stable  
252 cell line expressing the 30F-PLP2 luminescent reporter. To achieve this, we re-engineered the  
253 30F-GloSensor plasmid for lentiviral expression by: removing the SV40 poly(A) signal present  
254 after the FFluc coding-sequence; replacing the SV40 promoter driving Rluc expression with  
255 an internal ribosome entry site (IRES); adding a woodchuck hepatitis virus post-transcriptional  
256 regulatory element (WPRE) to increase the expression of the FFluc-IRES-Rluc transcript; and  
257 inserting the FFluc-IRES-Rluc-WPRE cassette into a pHSRIN-based lentiviral vector (**Figure**  
258 **7–figure supplement 1**). We then generated the HEK293T-ACE2-30F-PLP2 reporter cell line  
259 by lentiviral transduction of HEK293T-ACE2 cells.

260 To test this cell line in a scalable format, we seeded HEK293T-ACE2-30F-PLP2 cells in 96-  
261 well plates, infected them with wild-type SARS-CoV-2, then measured FFluc and Rluc  
262 luminescence after 24 h. As expected, we saw no difference in Rluc signal between mock-  
263 infected and SARS-CoV-2-infected cells (**Figure 7A**). Conversely, a dramatic increase in  
264 FFluc signal was evident in infected cells, with a 20-fold increase in the FFluc/Rluc ratio  
265 (**Figure 7A-B**). Similar to transient expression of the 30F-PLP2 reporter, treatment of the  
266 reporter cell line with remdesivir 1 h prior to infection abrogated the increase in luciferase  
267 activity (**Figure 7C**). Finally, we used the reporter cells to evaluate the SARS-CoV-2  
268 neutralising activity of two serum samples previously characterised in a spike-pseudotyped  
269 lentiviral assay (Mlcochova et al., 2020). As expected, our reporter cell line clearly  
270 distinguished convalescent serum from control (non-neutralising) serum, with a sigmoidal  
271 titration curve and a neutralising titre at 50% inhibition (NT<sub>50</sub>) of approximately 1000 (**Figure**  
272 **7D**). Taken together, these data demonstrate the utility of HEK293T-ACE2-30F-PLP2 cells for  
273 drug, neutralisation and general virological assays, using a simple luminescent readout.



## 274 Discussion

275 In this study, we have developed a versatile toolkit of cell-based fluorescent and luminescent  
276 reporters activated by SARS-CoV-2 proteases. Our data establish the feasibility of protease-  
277 activatable biosensors for the detection of SARS-CoV-2 infection, and demonstrate the  
278 practical utility of a luciferase-based reporter cell line for quantification of infected cells, drug  
279 testing and serological assays.

280 SARS-CoV-2 proteases are attractive therapeutic targets, and a feline coronavirus (FCoV)  
281 MPro inhibitor has shown promise in treating feline infectious peritonitis (FIP) in cats  
282 (Pedersen et al., 2018). FlipGFP-based reporters are ideally suited to the evaluation of small  
283 molecule inhibitors of SARS-CoV-2 MPro and/or PLPro activity in cells. In particular,  
284 quantification of reporter activation by the ratio of FlipGFP/mCherry fluorescence controls for  
285 non-specific changes in cell viability or reporter expression (such as caused by ritonavir and  
286 lopinavir). Accordingly, from a panel of inhibitors all previously shown to inhibit MPro *in vitro*,  
287 our cell-based assay was able to differentiate between compounds which are able to inhibit  
288 viral replication (GC373 and GC376) and those which are not (carmofur, disulfiram, PX-12,  
289 tideglusib).

290 Whilst this manuscript was in preparation, other groups have also described protease-  
291 activatable reporters for recombinant SARS-CoV-2 MPro (Drayman et al., 2020; Froggatt et  
292 al., 2020; Li et al., 2020; O'Brien et al., 2021; Rawson et al., 2021). In contrast to those studies,  
293 our primary aim was to develop practical protease-activatable reporters for authentic viral  
294 infection. Whilst we confirmed that FlipGFP-based biosensors may be activated by protease  
295 expression during viral infection, we observed a significant compression in their dynamic range  
296 in that context, compared with over-expression of recombinant proteases (26-fold to 3-fold for  
297 Opt3c/MPro reporter, and 12-fold to 3-fold for PLP2/PLPro reporter). Contributing factors likely  
298 include (but may not be limited to): lower protease expression levels plus/minus reduced  
299 accessibility during viral infection; background FlipGFP fluorescence; and the absence of

300 enzymatic signal amplification. Whilst providing proof of concept, FlipGFP-based reporters are  
301 therefore unlikely to be used to detect viral replication in practice.

302 To overcome these limitations, we therefore generated luciferase-based reporters. We  
303 envisioned at least three advantages of this approach: first, luciferase-based assays are  
304 typically highly sensitive; second, since the first step in measuring luciferase activity involves  
305 lysing cells, the readout is not affected by syncytia formation during viral infection; and third,  
306 luciferase-based assays may be readily adapted to high-throughput platforms. Accordingly,  
307 compared with FlipGFP, the window for luciferase-based reporter activation was greatly  
308 increased in assays of recombinant proteases (139-fold versus 26-fold for Opt3c/MPro  
309 reporters, and 74-fold versus 12-fold for PLP2/PLPro reporters) and viral infection (12-fold vs.  
310 3-fold for Opt3c/MPro reporters, and 29-fold versus 3-fold for PLP2/PLPro reporters).

311 Interestingly, whilst our luciferase-based Opt3c/MPro reporter displayed a higher sensitivity  
312 for recombinant protease, our PLP2/PLPro reporter performed markedly better during SARS-  
313 CoV-2 infection. This may reflect inversion of the expression levels of MPro and PLPro in the  
314 different settings, or differential accessibility of the reporters (substrates) to viral proteases in  
315 the context of viral infection. Since PLPro of SARS-CoV has deubiquitylation (DUB) activity,  
316 and is able to regulate whole cell levels of ubiquitylation during viral infection, we suspect that  
317 PLPro of SARS-CoV-2 may also be able to readily access a wide variety of cellular proteins,  
318 including cytosolic reporters (Yan and Wu, 2021). Either way, the use of a PLPro (rather than  
319 MPro) reporter was critical for the optimisation of our system.

320 By further reengineering the 30F-PLP2 reporter for lentiviral expression, we have generated  
321 the first stable, luminescent reporter cell line for SARS-CoV-2 infection. This simplifies the  
322 experimental workflow, and allows facile assays in a 96-well plate format. It is therefore ideally  
323 suited to high-throughput screens of candidate antiviral compounds or therapeutic antibodies,  
324 and/or large-scale serological surveys for neutralising activity against authentic virus. In fact,  
325 whilst the mechanism of reporter activation is different, our HEK293T-ACE2-30F-PLP2 cells  
326 are conceptually similar to TZM-bl reporter cells for HIV infection, and we anticipate a similar

327 range of uses. Further work in our lab is focussed on optimising the assay for a 384-well plate  
328 format, and generating stable reporter cell lines in other models of SARS-CoV-2 infection,  
329 such as human airway epithelial cells.

330 Compared with reverse-engineered fluorescent or luminescent reporter viruses, a key  
331 advantage of our luminescent reporter cell line is the potential to detect a range of clinical  
332 SARS-CoV-2 isolates, including emerging variants of concern. The assessment of the ability  
333 of these variants to escape from natural or vaccine-induced immunity has been complicated  
334 by variability in the pseudotype assays commonly used by different laboratories (Altmann et  
335 al., 2021). Beyond SARS-CoV-2, the PLP2 cleavage sequence is highly conserved in SARS-  
336 CoV, and partially conserved in MERS-CoV. This suggests that the Papain-like proteases of  
337 these viruses will also be able to activate our 30F-PLP2 biosensor, and we confirmed this in  
338 the case of recombinant SARS-CoV PLPro. Our biosensors therefore offer a standardised  
339 “off-the-shelf” solution for the quantitation of authentic betacoronavirus replication and  
340 neutralisation during this and (potentially) future coronavirus pandemics.

## 341 Materials and methods

### 342 Key resources table

| Reagent type (species) or resource     | Designation                                   | Source or reference             | Identifiers                                | Additional information                                                                                                                                  |
|----------------------------------------|-----------------------------------------------|---------------------------------|--------------------------------------------|---------------------------------------------------------------------------------------------------------------------------------------------------------|
| cell line (human)                      | HEK293T cells (293Ts)                         | A kind gift from Paul Lehner    | RRID: CVCL_0063                            | Authenticated by STR profiling (Menzies et al., 2018; Miles et al., 2017)                                                                               |
| cell line (human)                      | HEK293T-ACE2 cells                            | This paper                      | Not applicable                             | See Materials and methods for details                                                                                                                   |
| cell line (human)                      | HEK293T-ACE2-30F-PLP2 cells                   | This paper                      | Not applicable                             | See Materials and methods for details                                                                                                                   |
| cell line (monkey)                     | VeroE6 cells                                  | A kind gift from Rupert Beale   | RRID: CVCL_0059                            | Authenticated by species-specific PCR (IDEXX BioAnalytics)                                                                                              |
| strain, strain background (SARS-CoV-2) | SARS-CoV-2 virus                              | A kind gift from Ian Goodfellow | SARS-CoV-2/human/Liverpool/RE MRQ0001/2020 | See Materials and methods for details                                                                                                                   |
| recombinant DNA reagent                | PCDNA3-FlipGFP (TEV cleavage seq) T2A mCherry | Addgene                         | #124429                                    | Encodes FlipGFP (TEV cleavage sequence) and T2A mCherry                                                                                                 |
| recombinant DNA reagent                | pcDNA3-FlipGFP beta-sheets 1-9                | This paper                      | Not applicable                             | See Materials and methods for details                                                                                                                   |
| recombinant DNA reagent                | pcDNA3-FlipGFP beta-sheets 10/11              | This paper                      | Not applicable                             | See Materials and methods for details                                                                                                                   |
| recombinant DNA reagent                | pGloSensor-30F                                | Promega                         | Not applicable                             | Discontinued, but available from Promega upon request                                                                                                   |
| recombinant DNA reagent                | pDONR207 SARS-CoV-2 NSP3                      | Addgene                         | #141257                                    | Encodes SARS-CoV-2 PLPro                                                                                                                                |
| recombinant DNA reagent                | pDONR223 SARS-CoV-2 NSP5                      | Addgene                         | #141259                                    | Encodes SARS-CoV-2 MPro                                                                                                                                 |
| recombinant DNA reagent                | pHRSIN-30F-PLP2-IRES-hRluc-WPRE-PGK-Puro      | This paper                      | Not applicable                             | See Materials and methods for details                                                                                                                   |
| recombinant DNA reagent                | pHRSIN-ACE2-Hygro                             | This paper                      | Not applicable                             | See Materials and methods for details                                                                                                                   |
| recombinant DNA reagent                | pTAG-BFP-N                                    | Evrogen                         | FP172                                      | Encodes BFP                                                                                                                                             |
| recombinant DNA reagent                | pcDNA3.1 TEV (full-length)                    | Addgene                         | #64276                                     | Encodes TEV protease                                                                                                                                    |
| recombinant DNA reagent                | pHRSIN-Furin-Puro                             | A kind gift from Paul Lehner    | Not applicable                             | Encodes human furin                                                                                                                                     |
| recombinant DNA reagent                | psPAX2                                        | Addgene                         | #12260                                     | Lentiviral packaging plasmid                                                                                                                            |
| recombinant DNA reagent                | pCMV-VSV-G                                    | Addgene                         | #8454                                      | Lentiviral packaging plasmid                                                                                                                            |
| antibody                               | Anti-NSP3 (743 - 1072) SARS-CoV-2 antibody    | MRC PPU reagents                | Sheep Number: DA126, 1 <sup>st</sup> bleed | <a href="https://mrcppureagent.s.dundee.ac.uk/reagents-view-antibodies/703270">https://mrcppureagent.s.dundee.ac.uk/reagents-view-antibodies/703270</a> |
| antibody                               | Anti-NSP5 SARS-CoV-2 antibody                 | MRC PPU reagents                | Sheep Number: DA118, 2 <sup>nd</sup> bleed | <a href="https://mrcppu-covid.bio/antibodies/134216">https://mrcppu-covid.bio/antibodies/134216</a>                                                     |

|                         |                                                       |                                                                       |                  |                                            |
|-------------------------|-------------------------------------------------------|-----------------------------------------------------------------------|------------------|--------------------------------------------|
| antibody                | Anti-SARS-CoV-2 spike antibody [1A9]                  | Genetex                                                               | GTX632604        | For microscopy and flow cytometry (1:500)  |
| antibody                | SARS-CoV-2 nucleocapsid antibody                      | Novus Biologicals                                                     | NB100-56683      | For immunoblot (1:1000)                    |
| antibody                | Mouse monoclonal anti- $\beta$ -actin                 | Sigma                                                                 | A5316            | For immunoblot (1:20000)                   |
| antibody                | anti-mouse Alexa Fluor 647 (AF647) secondary antibody | Jackson ImmunoResearch                                                | #715-605-150     | For microscopy and flow cytometry (1:1000) |
| antibody                | anti-mouse Alexa Fluor 594 (AF594) secondary antibody | Jackson ImmunoResearch                                                | #715-585-150     | For microscopy (1:1000)                    |
| commercial assay or kit | Dual-Glo Luciferase Assay System                      | Promega                                                               | E2920            |                                            |
| commercial assay or kit | NEBuilder HiFi DNA Assembly Cloning Kit               | NEB                                                                   | E5520S           |                                            |
| commercial assay or kit | 5-alpha Competent <i>E. coli</i> (High Efficiency)    | NEB                                                                   | C2987            |                                            |
| commercial assay or kit | Micro BCA Protein Assay Kit                           | Thermo Fisher                                                         | 23235            |                                            |
| chemical compound, drug | Lopinavir                                             | APExBIO                                                               | A8204            |                                            |
| chemical compound, drug | Ritonavir                                             | APExBIO                                                               | A8203            |                                            |
| Chemical compound, drug | PX-12                                                 | APExBIO                                                               | A4509            |                                            |
| chemical compound, drug | Tideglusib                                            | APExBIO                                                               | B1539            |                                            |
| chemical compound, drug | Disulfiram                                            | APExBIO                                                               | A4015            |                                            |
| chemical compound, drug | Carmofur                                              | APExBIO                                                               | A2548            |                                            |
| chemical compound, drug | GC373                                                 | A kind gift from Wayne Vuong, John C. Vederas and M. Joanne Lemieux   | Not applicable   | (Vuong et al., 2020)                       |
| chemical compound, drug | GC376                                                 | A kind gift from Wayne Vuong, John C. Vederas and M. Joanne Lemieux   | Not applicable   | (Vuong et al., 2020)                       |
| chemical compound, drug | Remdesivir                                            | APExBIO                                                               | B8398            |                                            |
| chemical compound, drug | Favipiravir                                           | BioVision                                                             | 2778-5           | A kind gift from Aartjan te Velthuis       |
| software, algorithm     | Prism 8.0                                             | GraphPad                                                              | RRID: SCR_002798 |                                            |
| software, algorithm     | FlowJo 10.7                                           | TreeStar                                                              | RRID: SCR_008520 |                                            |
| software, algorithm     | WebLogo                                               | <a href="http://weblogo.berkeley.edu">http://weblogo.berkeley.edu</a> | RRID: SCR_010236 | (Crooks et al., 2004)                      |

343

344 **Cell culture**

345 HEK293T cells (a kind gift from Paul Lehner, authenticated by STR profiling (Menzies et al.,  
346 2018; Miles et al., 2017)) and VeroE6 cells (a kind gift from Rupert Beale, authenticated by  
347 species-specific PCR (IDEXX BioAnalytics)) were cultured in DMEM supplemented with 10%  
348 fetal calf serum (FCS), 100 units/ml penicillin, and 0.1 mg/ml streptomycin at 37 °C in 5% CO<sub>2</sub>.  
349 All cells were regularly screened and confirmed to be mycoplasma negative (Lonza MycoAlert  
350 and IDEXX BioAnalytics).

## 351 **Vectors for transgene expression**

### 352 FlipGFP-based reporters

353 To generate FlipGFP-based reporters, the TEV FlipGFP plasmid PCDNA3-FlipGFP(TEV  
354 cleavage seq) T2A mCherry (Addgene, #124429, a gift from Xiaokun Shu (Zhang et al., 2019))  
355 was used as a template for pairs of PCR reactions including primers designed to generate  
356 overlapping products replacing the TEV cleavage site with the indicated cleavage sequence  
357 (**Supplementary file 1**). For example, to replace the TEV cleavage site with the PLP2  
358 cleavage sequence, products generated by PCR reactions including 'Near Afel'/'PLP2 Rv' and  
359 'PLP2 Fw'/'Near AfIII' primer pairs were used. The same plasmid was then digested with Afel  
360 and AfIII and assembled with the gel purified PCR products using the HiFi Assembly Master  
361 Mix (NEB, E5520).

362 For independent expression of beta sheets 1-9 of FlipGFP, the PCDNA3-FlipGFP (TEV  
363 cleavage seq) T2A mCherry plasmid was digested with HindIII and NheI, then assembled with  
364 the indicated oligonucleotides (**Supplementary file 1**) as above. For independent expression  
365 of beta-sheets 10 and 11 of FlipGFP (including the Opt3c cleavage site), the pcDNA3-Opt3c-  
366 FlipGFP plasmid (generated as above) was used as a template for a PCR reaction with the  
367 indicated primers (**Supplementary file 1**), then assembled with EcoRI-linearized pcDNA3.1  
368 as above.

### 369 Luciferase-based reporters

370 To generate circularly permuted firefly luciferase (FFluc)-based reporters, the pGloSensor-  
371 30F plasmid (Promega) was digested with BamHI and HindIII, then assembled with  
372 oligonucleotides encoding the indicated cleavage sequences (**Supplementary file 1**) as  
373 above.

374 To generate a lentiviral expression vector for the 30F-PLP2 reporter, the pCMV-intron-30F-  
375 PLP2-pA-pSV40-hRluc reporter cassette was first amplified from the pGloSensor-30F PLP2  
376 plasmid using the indicated primers (**Supplementary file 1**), then assembled with pHRSIN-  
377 pCMV-EGFP-PGK-Puro (van den Boomen et al., 2020) digested with EcoRI and NotI as  
378 above. Next, the SV40 poly(A) signal and promoter were replaced with an internal ribosome  
379 entry site (IRES) to generate the final pHRSIN-30F-PLP2-IRES-hRluc-WPRE-PGK-Puro  
380 lentiviral expression vector. In brief, the pA-pSV40-hRluc fragment was excised by digestion  
381 with Sall, and replaced by three-way HiFi assembly (as above) with Renilla luciferase amplified  
382 by PCR from pGloSensor-30F using the indicated primers (**Supplementary file 1**) and a 586  
383 bp encephalomyocarditis virus (EMCV) IRES sequence. The final sequence of the 30F-PLP2-  
384 IRES-hRluc-WPRE-PGK-Puro reporter cassette is shown (**Supplementary file 1**).

#### 385 Viral proteases

386 To generate an expression vector for SARS-CoV-2 Main protease (MPro), the open reading  
387 frame was amplified by PCR from the pDONR223 SARS-CoV-2 NSP5 plasmid (Addgene,  
388 #141259, a gift from Fritz Roth (Kim et al., 2020)), including an ATG start codon in the forward  
389 primer and a TAA stop codon in the reverse primer (**Supplementary file 1**), then assembled  
390 with EcoRI-linearised pcDNA3.1 as above.

391 To generate an expression vector for the SARS-CoV-2 Papain-like protease catalytic domain  
392 (PLPro c.d.), we used the SARS-CoV nsp3 catalytic domain as a guide (Bekes et al., 2016).  
393 The coding sequence from amino acid 747E to 1061K was amplified by PCR from the  
394 pDONR207 SARS-CoV-2 NSP3 plasmid (Addgene, #141257, a gift from Fritz Roth (Kim et  
395 al., 2020)), including a Kozak sequence and ATG start codon in the forward primer and a TAA

396 stop codon in the reverse primer (**Supplementary file 1**), then assembled with EcoRI-  
397 linearised pcDNA3.1 as above. Where indicated, empty pcDNA3.1 was used as a control.

398 For expression of TEV protease, pcDNA3.1 TEV (full-length) (Addgene, #64276, a gift from  
399 Xiaokun Shu (To et al., 2015)) was used.

400 To generate an expression vector for the SARS-CoV Papain-like protease catalytic domain  
401 (PLPro c.d.) (Bekes et al., 2016), a gene block was synthesized by GenScript  
402 (**Supplementary file 1**), then assembled with pcDNA3.1 digested with BamHI and EcoRI as  
403 above.

#### 404 Other transgenes

405 For expression of BFP, pTAG-BFP-N (Evrogen, FP172) was used.

406 To generate a lentiviral expression vector for human ACE2, the open reading frame was  
407 amplified from a HepG2 cDNA library by PCR using the indicated primers (**Supplementary**  
408 **file 1**), then assembled with pHRSIN-pSFFV-GFP-PGK-Hygro (Tchasovnikarova et al., 2015)  
409 digested with KpnI and XhoI to generate pHRSIN-ACE2-Hygro as above.

410 For expression of human furin, pHRSIN-Furin-Puro (a kind gift from Paul Lehner) was used.

411 For lentiviral packaging, psPAX2 (Addgene, #12260, a gift from Didier Trono) and pCMV-VSV-  
412 G (Addgene, #8454, a gift from Bob Weinberg (Stewart et al., 2003)) were used.

413 All constructs generated for this study were verified by Sanger sequencing (Source  
414 BioScience).

#### 415 **Generation of HEK293T-ACE2 and HEK293T-ACE2-30F-PLP2 cells**

416 For transduction of HEK293T cells with ACE2, a pHRSIN-ACE2-Hygro lentiviral stock was  
417 generated by co-transfection of HEK293T cells with psPAX2 and pCMV-VSV-G using  
418 standard methods. After selection with hygromycin for 2 weeks, cells were sorted for high cell  
419 surface ACE2 expression and single-cell cloned. Following expansion, a clone with stable,



420 homogeneously high expression of ACE2 (herein termed clone 22) was selected for further  
421 experiments. For transduction with furin, a pHRSIN-Furin-Puro lentiviral stock was generated  
422 as above, and clone 22 cells (herein termed HEK293T-ACE2 cells) were selected with  
423 puromycin for a further 2 weeks. Finally, to generate the HEK293T-ACE2-30F-PLP2 reporter  
424 cell line, HEK293T-ACE2 cells were further transduced with a pHRSIN-30F-PLP2-IRES-  
425 hRluc-WPRE-PGK-Puro lentiviral stock at MOI=3, generated as above.

#### 426 **Production and titration of SARS-CoV-2 viral stocks**

427 The virus used in this study was the clinical isolate SARS-CoV-  
428 2/human/Liverpool/REMRQ0001/2020, a kind gift from Ian Goodfellow (University of  
429 Cambridge), isolated by Lance Turtle (University of Liverpool) and David Matthews and  
430 Andrew Davidson (University of Bristol) (Daly et al., 2020; Patterson et al., 2020).

431 Viral stocks were prepared by passaging once in VeroE6 cells. In brief, VeroE6 cells were  
432 infected at a low multiplicity of infection (MOI) with the original viral stock, and incubated for  
433 72 h (by which time cytopathic effect was evident). Virus-containing culture supernatants were  
434 then clarified by centrifugation at 600 g for 5 mins, and immediately frozen in aliquots at -80°C.  
435 Viral stocks were then titrated in VeroE6 cells by 50% tissue culture infectious dose (TCID50)  
436 assays using standard methods.

437 All experiments using SARS-CoV-2 virus were conducted in Containment Level 3 facility of  
438 the Jeffrey Cheah Biomedical Centre (JCBC), University of Cambridge.

#### 439 **Flow cytometric analysis of FlipGFP-based reporters in the presence of recombinant** 440 **proteases**

441 HEK293T cells were seeded at least 12 h in advance and transfected at approximately 50%  
442 confluency. Plasmids and TransIT-293 transfection reagent (Mirus) were mixed at a ratio of 1  
443 µg DNA : 3 µL TransIT-293 in Opti-MEM (Gibco). For an experiment conducted in triplicate at  
444 a 48-well scale, we typically used (per condition): 150 ng BFP expression vector, 300 ng  
445 FlipGFP-based reporter construct, and 450 ng of either empty pcDNA3.1 (control) or

446 pcDNA3.1 encoding the indicated protease; 2.7  $\mu$ L TransIT-293; and 150  $\mu$ L Opti-MEM (for  
447 50  $\mu$ L of transfection/well).

448 For titration of SARS-CoV-2 proteases, the total amount of DNA transfected was kept constant  
449 by adding additional empty pcDNA3.1. Where indicated, DMSO or candidate inhibitors of  
450 recombinant MPro or PLPro were added immediately after transfection.

451 Unless otherwise indicated, HEK293T cells were dissociated with trypsin 24 h post-  
452 transfection, resuspended in PBS + 0.5% FBS and analysed immediately by flow cytometry  
453 using a BD LSRFortessa equipped with 405 nm, 488 nm, 561 nm and 640 nm lasers. The  
454 ratio of FlipGFP/mCherry mean fluorescence intensity (MFI) in BFP+ (transfected) cells was  
455 used to quantitate reporter activation (FlowJo 10.7). An indicative gating strategy is shown in  
456 **Figure 1–figure supplement 2A.**

#### 457 **Flow cytometric analysis of spike protein expression in SARS-CoV-2-infected cells**

458 HEK293T-ACE2 cells were seeded at a density of  $9 \times 10^4$  cells/48-well in 250  $\mu$ L complete  
459 media. The following morning, cells were infected with SARS-CoV-2 at MOI=1 and incubated  
460 for 24 h.

461 To measure the fraction of infected cells using flow cytometry, cells were first dissociated with  
462 trypsin and fixed for 15 mins by incubation in 4% paraformaldehyde (PFA). Cells were then  
463 permeabilised with Perm/Wash buffer (BD), stained for SARS-CoV-2 spike protein using a  
464 mouse monoclonal antibody (GeneTex, GTX632604) for 30 mins at room temperature,  
465 washed twice, stained with an anti-mouse Alexa Fluor 647 (AF647) secondary antibody  
466 (Jackson ImmunoResearch, #715-605-150) for 30 mins at room temperature, washed twice,  
467 resuspended in PBS + 0.5% FBS and analysed by flow cytometry as above.

#### 468 **Automated microscopic analysis of spike protein expression in SARS-CoV-2-infected** 469 **cells**

470 HEK293T-ACE2 cells were seeded at a density  $9 \times 10^4$  cells/well of an 8-well  $\mu$ -Slide (Ibidi,  
471 Cat No 80826) in 250  $\mu$ L complete media. The following morning, cells were infected with  
472 SARS-CoV-2 at MOI=1 and incubated for 24 h.

473 To measure the fraction of infected cells using automated microscopy, cells were first fixed for  
474 15 mins by incubation in 4% PFA. Cells were then permeabilised with Perm/Wash buffer (BD),  
475 stained for SARS-CoV-2 spike protein using a mouse monoclonal antibody (GeneTex,  
476 GTX632604) for 30 mins at room temperature, washed twice, stained with an anti-mouse  
477 Alexa Fluor 594 (AF594) secondary antibody (Jackson ImmunoResearch, #715-585-150) for  
478 30 mins at room temperature, washed extensively, mounted with 200  $\mu$ L/well of Fluoroshield  
479 Mounting Media (Sigma, F6057), and analysed by automated microscopy.

480 In brief, images were acquired using a Cellomics ArrayScan XTI high-throughput imaging  
481 platform (Thermo Fisher) using a 386 nm excitation/emission filter to detect DAPI-stained  
482 nuclei and a 560 nm excitation/emission filter to detect AF594. Images were then analysed  
483 with built-in high content HCS Studio software (by Thermo Fisher) using the Target Activation  
484 application. For this, cellular objects were identified by applying overlays (masks) based on  
485 DAPI intensity. Necessary steps to exclude non-cellular artefacts (large or small objects) were  
486 activated based on average nuclei size. Additionally, background correction was performed  
487 on both channels. The generated nuclei masks were then applied to the AF594 channel and  
488 the threshold for AF594 staining was determined using stained mock-infected cells. Finally,  
489 cells were considered infected if their AF594 signal was above this threshold. 42 fields were  
490 scanned for each sample/condition to ensure the analysis of a sufficient number of cells.

#### 491 **Confocal microscopic analysis of FlipGFP-based reporters and spike protein** 492 **expression in SARS-CoV-2-infected cells**

493 HEK293T-ACE2 cells were seeded at a density  $9 \times 10^4$  cells/well of an 8-well  $\mu$ -Slide (Ibidi,  
494 Cat No 80826) in 250  $\mu$ L complete media. After 1 h, cells were transfected in duplicate with

495 the indicated FlipGFP-based reporter constructs as above. The following morning, cells were  
496 infected with SARS-CoV-2 at MOI=1 and incubated for 24 h.

497 To measure reporter activation in infected cells using confocal microscopy, cells were first  
498 fixed for 15 mins by incubation in 4% PFA. Cells were then permeabilised with Perm/Wash  
499 buffer (BD), stained for SARS-CoV-2 spike protein using a mouse monoclonal antibody  
500 (GeneTex, GTX632604) for 30 mins at room temperature, washed twice, stained with an anti-  
501 mouse AF647 secondary antibody (Jackson ImmunoResearch, #715-605-150) for 30 mins at  
502 room temperature, mounted with 200  $\mu$ L/well of Fluoroshield Mounting Media (Sigma, F6057),  
503 and analysed by confocal microscopy using a Zeiss LSM 710 Inverted confocal microscope  
504 equipped with 405, 458, 543 and 633 nm lasers and a Plan Apochromat 63X/1.40 Oil DIC  
505 M27 objective. For each reporter construct, the ratio of FlipGFP/mCherry MFI was calculated  
506 manually using Fiji (ImageJ), by creating a mask around syncytiated cells that were both  
507 spike+ (infected) and mCherry+ (transfected).

## 508 **Immunoblotting**

509 Washed cell pellets were lysed in PBS + 1% Triton supplemented with Halt Protease and  
510 Phosphatase Inhibitor Cocktail (Thermo Scientific) for 30 mins on wet ice. Post-nuclear  
511 supernatants were heated in Laemelli Loading Buffer for 5 mins at 95  $^{\circ}$ C, separated by SDS-  
512 PAGE and transferred to Immobilon-P membrane (Millipore). Membranes were blocked in  
513 PBS/5% non-fat dried milk (Marvel)/0.2% Tween and probed with the indicated primary  
514 antibody overnight at 4  $^{\circ}$ C. Reactive bands were visualised using HRP-conjugated secondary  
515 antibodies and SuperSignal West Pico or Dura chemiluminescent substrates (Thermo  
516 Scientific). Typically, 10–20  $\mu$ g total protein was loaded per lane.

## 517 **Luminescent analysis of luciferase-based reporters in the presence of recombinant** 518 **proteases**

519 HEK293T cells were transfected in triplicate at a 48-well scale essentially as for transfection  
520 of FlipGFP-based reporter constructs, typically using 150 ng of the indicated pGloSensor-30F

521 reporter construct and 150 ng of empty pcDNA3.1 (control) or pcDNA3.1 encoding the  
522 indicated protease.

523 After 24 h incubation, media was aspirated from each well, and cells lysed with 50  $\mu$ L/well  
524 Dual-Glo Luciferase Buffer (Promega) diluted 1:1 with PBS + 1% NP-40, for 10 mins at room  
525 temperature. Lysates were then transferred to opaque half-area 96-well plates, and reporter  
526 activation quantitated as the ratio of firefly luciferase (FFluc)/Renilla luciferase (Rluc) activity  
527 measured using the Dual-Glo kit (Promega) according to the manufacturer's instructions. In  
528 brief, FFluc activity was first measured using a ClarioStar microplate reader. 25  $\mu$ L Stop and  
529 Glo Buffer and Substrate (Promega) was then added to each well. After incubation for 10 mins  
530 at room temperature, Rluc activity was measured using the same ClarioStar microplate reader  
531 and the ratio of FFluc/Rluc activity calculated for each condition.

#### 532 **Luminescent analysis of luciferase-based reporters in SARS-CoV-2-infected cells**

533 HEK293T-ACE2 cells were reverse-transfected with plasmids and TransIT-293 at a ratio of 1  
534  $\mu$ g DNA : 3  $\mu$ L TransIT-293 in Opti-MEM (Gibco). For an experiment conducted in triplicate at  
535 a 48-well scale, we typically used (per condition): 900 ng pGloSensor-30F reporter construct;  
536 2.7  $\mu$ L TransIT-293; and 150  $\mu$ L Opti-MEM (for 50  $\mu$ L of transfection mix/well).  $2.7 \times 10^5$  cells  
537 were dissociated with Accutase, combined with the transfection mix, and seeded at  $9 \times 10^4$   
538 cells/well.

539 The following morning, cells were infected with SARS-CoV-2 at MOI=1 (or for the titration  
540 experiments, with the indicated volume of viral stock) and incubated for 24 h. Media was  
541 aspirated from each well, and cells lysed with 50  $\mu$ L/well of Dual-Glo Luciferase Buffer  
542 (Promega) diluted 1:1 with PBS + 1% NP-40 for 10 mins at room temperature. Lysates were  
543 then transferred to opaque half-area 96-well plates, and reporter activation quantitated as the  
544 ratio of FFluc/Rluc activity as above. Where indicated, candidate antivirals were added to the  
545 cells 1 h before infection with SARS-CoV-2.

#### 546 **Luminescent analysis of SARS-CoV-2-infected HEK293T-ACE2-30F-PLP2 reporter cells**

547 HEK293T-ACE2-30F-PLP2 reporter cells were seeded at a density of  $4 \times 10^4$  cells/96-well in  
548 100  $\mu$ L complete media. The following morning, cells were infected with SARS-CoV-2 at  
549 MOI=1 and incubated for 24 h. Media was aspirated from each well, and cells lysed with 25  
550  $\mu$ L/well of Dual-Glo Luciferase Buffer (Promega) diluted 1:1 with PBS + 1% NP-40 for 10 mins  
551 at room temperature. Lysates were then transferred to opaque half-area 96-well plates, and  
552 reporter activation quantitated as the ratio of FF<sub>luc</sub>/R<sub>luc</sub> activity as above. For evaluation of  
553 candidate antivirals, compounds were added to the cells 1 hr before infection with SARS-CoV-  
554 2. To measure SARS-CoV-2 neutralising activity, SARS-CoV-2 viral stock was pre-incubated  
555 with serial dilutions of heat-inactivated sera (a kind gift from Ravi Gupta) for 2 h at 37°C, prior  
556 to addition to the cells.

### 557 **SARS-CoV-2, SARS-CoV, and MERS-CoV sequence logos**

558 A SARS-CoV-2 genomic alignment file was retrieved from the GISAID database  
559 (<https://www.epicov.org/>). At the time of access (30/06/2020), this alignment (msa\_0630)  
560 contained 50,387 sequences. Genome sequences and alignments for MERS-CoV and SARS-  
561 CoV were accessed via the NCBI Virus portal  
562 ([https://www.ncbi.nlm.nih.gov/labs/virus/vssi/#/virus?SeqType\\_s=Nucleotide](https://www.ncbi.nlm.nih.gov/labs/virus/vssi/#/virus?SeqType_s=Nucleotide)). For the MERS-  
563 CoV sequences, we searched the database for Virus with taxonid=1335626 and Host with  
564 taxonid='human'. We set the nucleotide completeness option to 'complete' and alignments  
565 were generated using the NCBI alignment function. Consensus sequences automatically  
566 generated and included in the alignment file were removed. For the SARS-CoV sequences,  
567 we searched the database for Virus with taxonid=694009 and Host taxonid= 'human'. Because  
568 of the large number of sequences (~15,000), it was not possible to perform the alignment  
569 using the NCBI alignment function. Instead, FASTA sequences were downloaded and aligned  
570 using MAFFT (Kato et al., 2002) with default parameters.

571 Having manually inspected the genomic alignments to identify the regions of interest, we used  
572 the 'extractalign' function in the European Molecular Biology Open Software Suite (EMBOSS)  
573 (Rice et al., 2000). In the case of the GISAID alignment, we removed entries that were

574 incomplete or that presented nucleotide ambiguities (non-CTGA bases). The resulting sets  
575 (one per region of interest and four per alignment inspected) were conceptually translated  
576 using the 'transeq' function in EMBOSS. The resulting amino acid sequences were used as  
577 input for the WebLogo application (Crooks et al., 2004; Schneider and Stephens, 1990).

## 578 **Statistical analysis**

579 General data manipulation was conducted using Microsoft Excel, and statistical analysis using  
580 Graphpad Prism. Unless otherwise stated, sample means were compared by one-way  
581 ANOVA followed by Tukey's multiple comparison test. To calculate half-maximal inhibitory  
582 concentrations (IC50s), FFluc/Rluc ratios were analysed using the log(inhibitor) vs. response  
583 -- Variable slope (four parameters) function. To calculate neutralising antibody titres at 50%  
584 inhibition (NT50s), FFluc/Rluc ratios were analysed using the Sigmoidal, 4PL, X is  
585 log(concentration) function.

## 586 **Acknowledgements**

587 This work was supported by the MRC (CSF ref. MR/P008801/1 to NJM), NHSBT (grant ref.  
588 WPA15-02 to NJM), Addenbrooke's Charitable Trust (grant ref. to 900239 NJM), the Rosetree  
589 Trust (grant ref. G103718 to JRZ) and the NIHR Cambridge BRC. The authors thank Mark  
590 Wills for overseeing the Containment Level 3 facility, Nika Romashova for assistance with  
591 automated microscopy, Paul Lehner, James Nathan, Wayne Vuong, John C. Vederas, M.  
592 Joanne Lemieux, Aartjan te Velthuis, Rupert Beale, Ian Goodfellow and Ravi Gupta for  
593 supplying key reagents, and members of the Matheson and Lehner laboratories for critical  
594 discussion.

595

## 596 **Competing interests**

597 The authors declare no competing interests.



## 598 **Figures**

### 599 **Figure 1. FlipGFP-based SARS-CoV-2 protease reporters**

600 (A) Diagram of FlipGFP-based reporter containing the Opt3c protease cleavage sequence  
601 (TVRLQSGF). After cleavage by SARS-CoV-2 MPro, GFP beta-sheets 10 and 11 adopt an  
602 anti-parallel conformation and self-assemble with beta-sheets 1-9, restoring GFP  
603 fluorescence. Adapted from Zhang et al., 2019 (Zhang et al., 2019).

604 (B) Diagram of pp1a polyprotein showing candidate SARS-CoV-2 cleavage sequences. Three  
605 sequences for PLPro (PLP1, PLP2 and PLP3) and one sequence for MPro (WT3c) were  
606 chosen. Sites of cleavage are highlighted in red (C-terminal side of indicated amino acid).

607 (C-F) Activation of FlipGFP-based reporters by recombinant SARS-CoV-2 protease  
608 expression. HEK293T cells were co-transfected with FlipGFP-based reporter constructs  
609 encoding candidate MPro (WT3c or Opt3C, C-D) or PLPro (PLP1-3, E-F) cleavage  
610 sequences, BFP and either MPro (C-D) or PLPro (E-F), or empty pcDNA3.1 as a control. For  
611 FlipGFP and mCherry fluorescence in BFP+ cells were analysed by flow cytometry 24 h post-  
612 transfection (**Figure 1–figure supplement 2A**). Illustrative flow cytometry data and mean  
613 values  $\pm$  SEM are shown for an experiment performed in triplicate. \*\*\*\*  $p < 0.0001$ .  
614 Representative of 5 independent experiments.

615 (G) Detection of FlipGFP-based reporter activation by epifluorescence microscopy. HEK293T  
616 cells were co-transfected with Opt3c-FlipGFP biosensor plus/minus MPro (left panel) or PLP2-  
617 FlipGFP biosensor plus/minus PLPro (right panel). FlipGFP and mCherry fluorescence were  
618 analysed by epifluorescence microscopy 24 h post-transfection. mCherry, red. FlipGFP,  
619 green. Representative of 3 independent experiments.

620 MPro, recombinant SARS-CoV-2 Main Protease. PLPro c.d., catalytic domain of recombinant  
621 SARS-CoV-2 Papain-Like Protease.

### 622 **Figure 2. Evaluation of candidate SARS-CoV-2 protease inhibitors**

623 (A-B) Inhibition of MPro-dependent Opt3c-FlipGFP biosensor activation by GC373 and  
624 GC376. HEK293T cells were co-transfected with Opt3c-FlipGFP biosensor and BFP  
625 plus/minus MPro, then treated with DMSO, GC373 (100  $\mu$ M) or GC376 (100  $\mu$ M). FlipGFP  
626 and mCherry fluorescence in BFP+ cells were analysed by flow cytometry 24 h post-  
627 transfection. Illustrative flow cytometry data and mean values  $\pm$  SEM are shown for an  
628 experiment performed in triplicate. \*\*\*\*  $p < 0.0001$ . Representative of 3 independent  
629 experiments.

630 (C) Dose responses to GC373 and GC376. HEK293T cells were co-transfected with Opt3c-  
631 FlipGFP biosensor, BFP and MPro, then treated with DMSO or decreasing doses of GC373  
632 or GC373 (100, 25, 6.25, and 1.56  $\mu$ M). FlipGFP and mCherry fluorescence in BFP+ cells  
633 were analysed by flow cytometry 24 h post-transfection. Illustrative flow cytometry data and  
634 mean values  $\pm$  SEM are shown for an experiment performed in triplicate. Representative of 2  
635 independent experiments.

636 (D-G) Specificity of GC376. HEK293T cells were co-transfected with PLP2-FlipGFP biosensor  
637 and BFP plus/minus PLPro (D-E) or TEV-FlipGFP and BFP plus/minus TEV protease (F-G),  
638 then treated with DMSO or GC376 (100  $\mu$ M). FlipGFP and mCherry fluorescence in BFP+  
639 cells were analysed by flow cytometry 24 h post-transfection. Illustrative flow cytometry data  
640 and mean values  $\pm$  SEM are shown for an experiment performed in triplicate. Representative  
641 of 2 independent experiments.

642 MPro, recombinant SARS-CoV-2 Main Protease. PLPro c.d., catalytic domain of recombinant  
643 SARS-CoV-2 Papain-Like Protease. TEV, recombinant TEV protease.

### 644 **Figure 3. FlipGFP-based biosensors of SARS-CoV-2 infection**

645 (A-B) Activation of FlipGFP-based reporters by SARS-CoV-2 infection. HEK293T-ACE2 cells  
646 were transfected with Opt3c-FlipGFP, non-cleavable Opt3c-FlipGFP, PLP2-FlipGFP, or non-  
647 cleavable PLP2-FlipGFP biosensors, incubated for 12 h, then infected with SARS-CoV-2 at  
648 MOI=1. Cells were fixed, permeabilised and stained for SARS-CoV-2 spike protein 24 h post-

649 infection. FlipGFP and mCherry fluorescence in spike+ syncytia versus spike- cells were  
650 analysed by confocal microscopy. Illustrative microscopy data (A) and mean values  $\pm$  SEM  
651 are shown for at least 15 syncytia/cells from each condition (B). \*\*\*\*  $p < 0.0001$ . mCherry, red.  
652 FlipGFP, green. Spike, yellow. DAPI, blue. DIC, differential interference contrast.  
653 Representative of 2 independent experiments.

654 (C) Expression levels of SARS-CoV-2 proteases. HEK293T-ACE2 cells were mock-infected,  
655 infected with SARS-CoV-2 at MOI=1 or transfected with MPro (left panel) or PLPro (right  
656 panel) under standard conditions. Cells were lysed after 24 h and analysed by immunoblot  
657 using antibodies specific for nsp5 (MPro), the PLPro c.d. of nsp3 or nucleocapsid.  $\beta$ -actin was  
658 included as a loading control. Arrows indicate presumed full-length nsp3 (215 kDa) and  
659 intermediate cleavage products present in SARS-CoV-2 infected cells. Asterisk indicates  
660 recombinant PLPro c.d.. Representative of 2 independent experiments.

661 O.E., over-expression. MPro, recombinant SARS-CoV-2 Main Protease. PLPro c.d., catalytic  
662 domain of recombinant SARS-CoV-2 Papain-Like Protease.

#### 663 **Figure 4. Luciferase-based SARS-CoV-2 proteases reporters**

664 (A) Diagram of 30F-GloSensor luciferase-based reporter containing the Opt3c cleavage  
665 sequence (TVRLQSGF). Cleavage by SARS-CoV-2 MPro leads to a conformational change  
666 in the circularly permuted firefly luciferase (FFluc) molecule, markedly increasing  
667 luminescence. 30-FF-358-544/30-FF-4-354, circularly permuted firefly luciferase-based  
668 reporter (numbers indicate positions of amino acids in wildtype FFluc). Adapted from Wigdal  
669 et al. (Wigdal et al., 2008).

670 (B-C) Activation of luciferase-based reporters by recombinant SARS-CoV-2 protease  
671 expression. HEK293T cells were co-transfected with 30F-Opt3c, non-cleavable 30F-Opt3c,  
672 30F-PLP2, or non-cleavable 30F-PLP2 biosensors plus/minus MPro or PLPro, and FFluc and  
673 Renilla luciferase (Rluc) activities measured by luminometry 24 h post-transfection. Mean  
674 FFluc and Rluc luminescence and FFluc/Rluc ratios  $\pm$  SEM are shown for a representative

675 experiment performed in triplicate (B). Mean fold-changes in FFluc/Rluc ratios  $\pm$  SEM in the  
676 presence or absence of cognate protease are shown for 3 independent experiments, each  
677 performed in triplicate (C). \*\*\*\*  $p < 0.0001$ . RLU, relative light units.

678 (D) Specificity of luciferase-based reporters. HEK293T cells were co-transfected with 30F-  
679 Opt3c or 30F-PLP2 biosensors plus/minus MPro, PLPro or TEV proteases, and FFluc and  
680 Rluc activities measured by luminometry 24 h post-transfection. Mean FFluc and Rluc  
681 luminescence and FFluc/Rluc ratios  $\pm$  SEM are shown for an experiment performed in  
682 triplicate. Representative of 2 independent experiments.

683 MPro, recombinant SARS-CoV-2 Main Protease. PLPro c.d., catalytic domain of recombinant  
684 SARS-CoV-2 Papain-Like Protease. TEV, recombinant TEV protease.

#### 685 **Figure 5. Luciferase-based biosensors of SARS-CoV-2 infection**

686 (A-B) Activation of luciferase-based reporters by SARS-CoV-2 infection. HEK293T-ACE2 cells  
687 were transfected with 30F-Opt3c, non-cleavable 30F-Opt3c, 30F-PLP2, or non-cleavable 30F-  
688 PLP2 biosensors, incubated for 12 h, then infected with SARS-CoV-2 at MOI=1. FFluc and  
689 Rluc activities were measured by luminometry 24 h post-infection. Mean FFluc and Rluc  
690 luminescence and FFluc/Rluc ratios  $\pm$  SEM are shown for a representative experiment  
691 performed in triplicate (A). Mean fold-changes in FFluc/Rluc ratios  $\pm$  SEM in the presence or  
692 absence of SARS-CoV-2 infection are shown for 3 independent experiments, each performed  
693 in triplicate (B). \*\*\*  $p < 0.001$ , \*\*\*\*  $p < 0.0001$ . RLU, relative light units.

694 (C-F) Quantitation of infected cells. HEK293T-ACE2 cells were transfected with 30F-PLP2  
695 biosensor, incubated for 12 h, then mock-infected or infected with increasing doses of SARS-  
696 CoV-2. Cells were analysed in parallel 24 h post-infection by either epifluorescence  
697 microscopy for SARS-CoV-2 spike protein (C-D), or luminometry for FFluc and Rluc activities  
698 (E). Spike+ cells were enumerated by automated microscopy (Cellomics). Illustrative  
699 microscopy data (C) and mean values  $\pm$  SEM (D-E) are shown for an experiment performed  
700 in duplicate (microscopy) or triplicate (luminometry). The correlation between FFluc/Rluc ratios

701 and the proportions of spike+ cells is shown (F). Spike, red. DAPI, blue. DIC, differential  
702 interference contrast. Representative of 2 independent experiments.

### 703 **Figure 6. Evaluation of candidate SARS-CoV2 antivirals**

704 (A) Schematic of experiment to evaluate candidate antivirals using 30F-PLP2 biosensor.

705 (B) Inhibition of SARS-CoV-2 replication by candidate antivirals. HEK293T-ACE2 cells were  
706 transfected with 30F-PLP2 biosensor, incubated for 12 h, then infected with SARS-CoV-2 at  
707 MOI=1. From 1 h prior to infection, cells were treated with DMSO or decreasing doses of  
708 antivirals. FFluc and Rluc activities were measured by luminometry 24 h post-infection. Mean  
709 FFluc/Rluc ratios  $\pm$  SEM are shown (as % DMSO-treated cells) for an experiment performed  
710 in triplicate. Titration curves and IC50s are included for remdesivir and GC376. Representative  
711 of 2 independent experiments.

### 712 **Figure 7. Luminescent SARS-CoV-2 reporter cell line**

713 (A-B) Activation of reporter cells by SARS-CoV-2 infection. HEK293T-ACE2-30F-PLP2 cells  
714 were infected with SARS-CoV-2 at MOI=1. FFluc and Rluc activities were measured by  
715 luminometry 24 h post-infection. Mean FFluc and Rluc luminescence and FFluc/Rluc ratios  
716 (A) and fold-change in FFluc/Rluc ratio (B)  $\pm$  SEM are shown for an experiment performed in  
717 triplicate. Representative of 3 independent experiments. RLU, relative light units.

718 (C) Inhibition of SARS-CoV-2 infection by remdesivir. HEK293T-ACE2-30F-PLP2 cells were  
719 infected with SARS-CoV-2 at MOI=1. From 1 h prior to infection, cells were treated with DMSO  
720 or remdesivir. FFluc and Rluc activities were measured by luminometry 24 h post-infection.  
721 Mean FFluc/Rluc ratios  $\pm$  SEM are shown (as % DMSO-treated cells) for an experiment  
722 performed in triplicate. Representative of 2 independent experiments.

723 (D) SARS-CoV2 neutralisation assay. HEK293T-ACE2-30F-PLP2 cells were infected with  
724 SARS-CoV-2 at MOI=1 following pre-incubation with serial dilutions of control or convalescent  
725 serum for 2 h at 37°C. FFluc and Rluc activities were measured by luminometry 24 h post-

726 infection. Mean FFluc/Rluc ratios  $\pm$  SEM are shown (as % cells treated with SARS-CoV-2 at  
727 MOI=1 without pre-incubation with serum) for an experiment performed in triplicate.  
728 Representative of 2 independent experiments.

## 729 **Figure supplements**

### 730 **Figure 1–figure supplement 1. Cleavage sequences of other highly pathogenic human** 731 **betacoronaviruses**

732 (A) Conservation of cleavage sequences. Amino acid sequence logos for cleavage sequences  
733 between nsp1/nsp2 (PLP1), nsp2/nsp3 (PLP2), nsp3/nsp4 (PLP3), and nsp4/nsp5 (WT3c) of  
734 SARS-CoV-2, SARS-CoV and MERS-CoV viruses. Relative letter heights indicate  
735 conservation across the sequences analysed.

736 (B) FlipGFP-based reporter activation by PLPro of SARS-CoV. HEK293T cells were co-  
737 transfected with 30F-PLP2 biosensor and PLPro of either SARS-CoV-2 or SARS-CoV, and  
738 FFluc and Rluc activities measured by luminometry 24 h post-transfection. Mean fold-changes  
739 in FFluc/Rluc ratios  $\pm$  SEM in the presence or absence of protease are shown for an  
740 experiment performed in triplicate. Representative of 2 independent experiments.

741 PLPro c.d., catalytic domain of recombinant Papain-Like Protease.

### 742 **Figure 1–figure supplement 2. Optimisation of FlipGFP-based reporters**

743 (A) Indicative gating strategy for flow cytometry experiments using FlipGFP-based reporters.  
744 Cells were typically gated on FSC-H and SSC-H, and doublets excluded using FSC-W.  
745 FlipGFP and mCherry fluorescence were analysed in BFP+ (transfected) cells. Data illustrate  
746 change in fluorescence of Opt3c-FlipGFP biosensor in the presence (lower panels) or absence  
747 (upper panels) of MPro.

748 (B) Origin of background FlipGFP fluorescence. HEK293T cells were transfected with BFP  
749 and GFP1-9-T2A-mCherry (encoding FlipGFP beta-sheets 1-9), GFP10-E5-GFP11-Opt3c-K5  
750 (encoding FlipGFP beta-sheets 10-11) or Opt3c-FlipGFP biosensor plus/minus MPro.  
751 FlipGFP and mCherry fluorescence in BFP+ cells were analysed by flow cytometry 24 h post-  
752 transfection. Representative of 2 independent experiments.

753 (C-D) Optimisation of FlipGFP-based reporter/protease ratio. HEK239T cells were co-  
754 transfected with BFP and increasing amounts of Opt3c-FlipGFP biosensor plus/minus MPro,  
755 keeping the total amount of plasmid DNA constant by adding empty pcDNA3.1. FlipGFP and  
756 mCherry fluorescence in BFP+ cells were analysed by flow cytometry 24 h post-transfection.  
757 Illustrative flow cytometry data and mean values  $\pm$  SEM are shown for an experiment  
758 performed in duplicate. Representative of 2 independent experiments.

759 (E) Optimisation of interval between transfection and analysis. HEK293T cells were  
760 transfected Opt3c-FlipGFP biosensor, BFP plus/minus MPro. FlipGFP and mCherry  
761 fluorescence in BFP+ cells were analysed by flow cytometry 24 h or 36 h post-transfection.  
762 Illustrative flow cytometry data and mean values  $\pm$  SEM are shown for an experiment  
763 performed in duplicate. Representative of 2 independent experiments.

764 MPro, recombinant SARS-CoV-2 Main Protease.

### 765 **Figure 1–figure supplement 3. Specificity of FlipGFP-based reporters**

766 (A-B) Specificity of FlipGFP-based reporters for cognate proteases. HEK293T cells were co-  
767 transfected with Opt3c-FlipGFP, PLP2-FlipGFP, and TEV-FlipGFP biosensors, BFP and  
768 MPro, PLPro c.d., or TEV protease. FlipGFP and mCherry fluorescence in BFP+ cells were  
769 analysed by flow cytometry 24 h post-transfection. Illustrative flow cytometry data (A) and  
770 mean values  $\pm$  SEM (B) are shown for an experiment performed in triplicate. \*\*\*\*  $p < 0.0001$ .  
771 Representative of 3 independent experiments.

772 (C-D) Sequence specificity of MPro. HEK293T cells were co-transfected with Opt3c-FlipGFP  
773 or non-cleavable Opt3c-FlipGFP biosensors, BFP plus/minus MPro. FlipGFP and mCherry  
774 fluorescence in BFP+ cells were analysed by flow cytometry 24 h post-transfection. Illustrative  
775 flow cytometry data (C) and mean values  $\pm$  SEM (D) are shown for an experiment performed  
776 in triplicate. \*\*\*\*  $p < 0.0001$ . Cleavable/non-cleavable Opt3c sequences are shown, with the  
777 cleavage site highlighted in red (C-terminal side of the indicated amino acid). Representative  
778 of 3 independent experiments.



779 (E-F) Sequence specificity of PLPro. HEK293T cells were co-transfected with PLP2-FlipGFP  
780 or non-cleavable PLP2-FlipGFP biosensors, BFP plus/minus PLPro. FlipGFP and mCherry  
781 fluorescence in BFP+ cells were analysed by flow cytometry 24 h post-transfection. Illustrative  
782 flow cytometry data (E) and mean values  $\pm$  SEM (F) are shown for an experiment performed  
783 in triplicate. \*\*\*\*  $p < 0.0001$ . Cleavable/non-cleavable PLP2 sequences are shown, with the  
784 cleavage site highlighted in red (C-terminal side of the indicated amino acid). Representative  
785 of 3 independent experiments.

786 MPro, recombinant SARS-CoV-2 Main Protease. PLPro c.d., catalytic domain of recombinant  
787 SARS-CoV-2 Papain-Like Protease. TEV, recombinant TEV protease.

## 788 **Figure 2—figure supplement 1. Evaluation of additional SARS-CoV-2 protease inhibitors**

789 (A) MPro-dependent Opt3c-FlipGFP biosensor activation in the presence of candidate  
790 protease inhibitors. HEK293T cells were co-transfected with Opt3c-FlipGFP biosensor, BFP  
791 plus/minus MPro, then treated with DMSO or protease inhibitors. FlipGFP and mCherry  
792 fluorescence in BFP+ cells were analysed by flow cytometry 24 h post-transfection. Mean  
793 values  $\pm$  SEM are shown for an experiment performed in duplicate. Representative of 2  
794 independent experiments.

795 (B) Dose responses to lopinavir and ritonavir. HEK293T cells were co-transfected with Opt3c-  
796 FlipGFP biosensor, BFP plus/minus MPro, then treated with DMSO or decreasing doses of  
797 lopinavir or ritonavir (25, 12, 6 and 3  $\mu$ M). 24 h post-transfection cells were analysed by FACS.  
798 FlipGFP and mCherry fluorescence in BFP+ cells were analysed by flow cytometry 24 h post-  
799 transfection. Mean values  $\pm$  SEM are shown for an experiment performed in duplicate.  
800 Representative of 2 independent experiments.

801 (C) Effects of GC373, GC376, lopinavir and ritonavir on transfection efficiency. The proportion  
802 of BFP+ (transfected) cells was analysed by flow cytometry for cells from (B) for lopinavir and  
803 ritonavir, and from **Figure 2C** for GC373 and GC376. Mean values  $\pm$  SEM are shown for an  
804 experiment performed in duplicate. Representative of 2 independent experiments.

805 **Figure 3–figure supplement 1. Infection of HEK293T-ACE2 cells by SARS-CoV-2**

806 (A) Cytopathic effect in HEK293T-ACE2 cells. HEK293T or HEK293T-ACE2 cells were  
807 infected with SARS-CoV-2 at MOI=1 then examined for cytopathic effect using brightfield  
808 microscopy after 24 h. Representative of >10 independent experiments.

809 (B-C) Loss of spike+ HEK293T-ACE2 cells during flow cytometric analysis. HEK293T-ACE2  
810 cells were infected with SARS-CoV-2 at MOI=1. Cells were analysed in parallel 24 h post-  
811 infection for SARS-CoV-2 spike protein by either automated microscopy (Cellomics) or flow  
812 cytometry. In each case, the proportion of spike+ cells was measured. Illustrative data (B) and  
813 mean values  $\pm$  SEM (C) are shown for an experiment performed in triplicate. \*\*\*\*  $p < 0.0001$ .  
814 Spike, yellow. DAPI, blue. Representative of 2 independent experiments.

815 **Figure 7–figure supplement 1. 30F-PLP2 constructs**

816 Diagrams of 30F-PLP2 luciferase-based reporter in pGloSensor-30F and pHRSIN-30F-PLP2-  
817 IRES-hRluc-WPRE-PGK-Puro expression vectors. 30-FF-358-544/30-FF-4-354, circularly  
818 permuted firefly luciferase-based reporter, orange (numbers indicate positions of amino acids  
819 in wildtype FFluc). hRluc, codon-optimised (humanised) Renilla luciferase, cyan. LTR, HIV-1  
820 long terminal repeat, yellow. IRES, internal ribosome entry site, brown. WPRE, woodchuck  
821 hepatitis virus post-transcriptional regulatory element (WPRE), purple. PuroR, puromycin  
822 resistance, green.

823 **Supplementary files**

824 **Supplementary file 1. Sequences of PCR primers, oligonucleotides and constructs**

825 **used in this study**

## 826 **References**

- 827 Altmann, D.M., Boyton, R.J., and Beale, R. (2021). Immunity to SARS-CoV-2 variants of  
828 concern. *Science* 371, 1103-1104.
- 829 An, W.F., and Tolliday, N. (2010). Cell-based assays for high-throughput screening. *Mol*  
830 *Biotechnol* 45, 180-186.
- 831 Arias-Arias, J.L., MacPherson, D.J., Hill, M.E., Hardy, J.A., and Mora-Rodriguez, R. (2020). A  
832 fluorescence-activatable reporter of flavivirus NS2B-NS3 protease activity enables live  
833 imaging of infection in single cells and viral plaques. *J Biol Chem* 295, 2212-2226.
- 834 Bekes, M., van der Heden van Noort, G.J., Ekkebus, R., Ovaa, H., Huang, T.T., and Lima,  
835 C.D. (2016). Recognition of Lys48-Linked Di-ubiquitin and Deubiquitinating Activities of the  
836 SARS Coronavirus Papain-like Protease. *Mol Cell* 62, 572-585.
- 837 Cao, B., Wang, Y., Wen, D., Liu, W., Wang, J., Fan, G., Ruan, L., Song, B., Cai, Y., Wei, M.,  
838 *et al.* (2020). A Trial of Lopinavir–Ritonavir in Adults Hospitalized with Severe Covid-19. *New*  
839 *England Journal of Medicine* 382, 1787-1799.
- 840 Chen, Y., Liu, Q., and Guo, D. (2020). Emerging coronaviruses: Genome structure, replication,  
841 and pathogenesis. *J Med Virol* 92, 418-423.
- 842 Chuck, C.P., Chong, L.T., Chen, C., Chow, H.F., Wan, D.C., and Wong, K.B. (2010). Profiling  
843 of substrate specificity of SARS-CoV 3CL. *PLoS One* 5, e13197.
- 844 Crooks, G.E., Hon, G., Chandonia, J.M., and Brenner, S.E. (2004). WebLogo: a sequence  
845 logo generator. *Genome Res* 14, 1188-1190.
- 846 Daly, J.L., Simonetti, B., Klein, K., Chen, K.E., Williamson, M.K., Anton-Plagaro, C.,  
847 Shoemark, D.K., Simon-Gracia, L., Bauer, M., Hollandi, R., *et al.* (2020). Neuropilin-1 is a host  
848 factor for SARS-CoV-2 infection. *Science* 370, 861-865.
- 849 Donal, T.S., Adam, C.H., Javier, G.-J., Michael, L.K., Stephanie, L., Anthony, B., Sandra, A.,  
850 Emily, A., Helen, B., Medawar Laboratory, T., *et al.* (2021). Research Square.
- 851 Drayman, N., Jones, K.A., Azizi, S.-A., Froggatt, H.M., Tan, K., Maltseva, N.I., Chen, S.,  
852 Nicolaescu, V., Dvorkin, S., Furlong, K., *et al.* (2020). Drug repurposing screen identifies

853 masitinib as a 3CLpro inhibitor that blocks replication of SARS-CoV-2 &emdash;in  
854 vitro&emdash;. bioRxiv, 2020.2008.2031.274639.

855 Froggatt, H.M., Heaton, B.E., and Heaton, N.S. (2020). Development of a Fluorescence-  
856 Based, High-Throughput SARS-CoV-2 3CL(pro) Reporter Assay. *J Virol* 94.

857 Harrington, D.P., Baden, L.R., and Hogan, J.W. (2021). A Large, Simple Trial Leading to  
858 Complex Questions. *N Engl J Med* 384, 576-577.

859 Hoffmann, M., Kleine-Weber, H., Schroeder, S., Kruger, N., Herrler, T., Erichsen, S.,  
860 Schiergens, T.S., Herrler, G., Wu, N.H., Nitsche, A., *et al.* (2020). SARS-CoV-2 Cell Entry  
861 Depends on ACE2 and TMPRSS2 and Is Blocked by a Clinically Proven Protease Inhibitor.  
862 *Cell* 181, 271-280 e278.

863 Horby, P.W., Mafham, M., Bell, J.L., Linsell, L., Staplin, N., Emberson, J., Palfreeman, A.,  
864 Raw, J., Elmahi, E., Prudon, B., *et al.* (2020). Lopinavir–ritonavir in patients admitted to  
865 hospital with COVID-19 (RECOVERY): a randomised, controlled, open-label, platform trial.  
866 *The Lancet* 396, 1345-1352.

867 Hyseni, I., Molesti, E., Benincasa, L., Piu, P., Casa, E., Temperton, N.J., Manenti, A., and  
868 Montomoli, E. (2020). Characterisation of SARS-CoV-2 Lentiviral Pseudotypes and  
869 Correlation between Pseudotype-Based Neutralisation Assays and Live Virus-Based Micro  
870 Neutralisation Assays. *Viruses* 12.

871 Jin, Z., Du, X., Xu, Y., Deng, Y., Liu, M., Zhao, Y., Zhang, B., Li, X., Zhang, L., Peng, C., *et al.*  
872 (2020a). Structure of M(pro) from SARS-CoV-2 and discovery of its inhibitors. *Nature* 582,  
873 289-293.

874 Jin, Z., Zhao, Y., Sun, Y., Zhang, B., Wang, H., Wu, Y., Zhu, Y., Zhu, C., Hu, T., Du, X., *et al.*  
875 (2020b). Structural basis for the inhibition of SARS-CoV-2 main protease by antineoplastic  
876 drug carmofur. *Nat Struct Mol Biol* 27, 529-532.

877 Jordan, A., Bisgrove, D., and Verdin, E. (2003). HIV reproducibly establishes a latent infection  
878 after acute infection of T cells in vitro. *EMBO J* 22, 1868-1877.

879 Katoh, K., Misawa, K., Kuma, K.i., and Miyata, T. (2002). MAFFT: a novel method for rapid  
880 multiple sequence alignment based on fast Fourier transform. *Nucleic Acids Research* 30,  
881 3059-3066.

882 Kilianski, A., Mielech, A.M., Deng, X., and Baker, S.C. (2013). Assessing activity and inhibition  
883 of Middle East respiratory syndrome coronavirus papain-like and 3C-like proteases using  
884 luciferase-based biosensors. *J Virol* 87, 11955-11962.

885 Kim, D.K., Knapp, J.J., Kuang, D., Chawla, A., Cassonnet, P., Lee, H., Sheykhkarimli, D.,  
886 Samavarchi-Tehrani, P., Abdouni, H., Rayhan, A., *et al.* (2020). A Comprehensive, Flexible  
887 Collection of SARS-CoV-2 Coding Regions. G3 (Bethesda).

888 Kim, Y., Lovell, S., Tiew, K.C., Mandadapu, S.R., Alliston, K.R., Battaile, K.P., Groutas, W.C.,  
889 and Chang, K.O. (2012). Broad-spectrum antivirals against 3C or 3C-like proteases of  
890 picornaviruses, noroviruses, and coronaviruses. *J Virol* 86, 11754-11762.

891 Kneller, D.W., Phillips, G., O'Neill, H.M., Jedrzejczak, R., Stols, L., Langan, P., Joachimiak,  
892 A., Coates, L., and Kovalevsky, A. (2020). Structural plasticity of SARS-CoV-2 3CL M(pro)  
893 active site cavity revealed by room temperature X-ray crystallography. *Nat Commun* 11, 3202.

894 Li, X., Lidsky, P., Xiao, Y., Wu, C.T., Garcia-Knight, M., Yang, J., Nakayama, T., Nayak, J.V.,  
895 Jackson, P.K., Andino, R., *et al.* (2020). Ethacridine inhibits SARS-CoV-2 by inactivating viral  
896 particles in cellular models. *bioRxiv*.

897 Lindsten, K., Uhlikova, T., Konvalinka, J., Masucci, M.G., and Dantuma, N.P. (2001). Cell-  
898 based fluorescence assay for human immunodeficiency virus type 1 protease activity.  
899 *Antimicrob Agents Chemother* 45, 2616-2622.

900 Ma, C., Sacco, M.D., Hurst, B., Townsend, J.A., Hu, Y., Szeto, T., Zhang, X., Tarbet, B., Marty,  
901 M.T., Chen, Y., *et al.* (2020). Boceprevir, GC-376, and calpain inhibitors II, XII inhibit SARS-  
902 CoV-2 viral replication by targeting the viral main protease. *Cell Res* 30, 678-692.

903 Matheson, N.J., and Lehner, P.J. (2020). How does SARS-CoV-2 cause COVID-19? *Science*  
904 369, 510-511.

905 Menzies, S.A., Volkmar, N., van den Boomen, D.J., Timms, R.T., Dickson, A.S., Nathan, J.A.,  
906 and Lehner, P.J. (2018). The sterol-responsive RNF145 E3 ubiquitin ligase mediates the  
907 degradation of HMG-CoA reductase together with gp78 and Hrd1. *Elife* 7.

908 Miles, A.L., Burr, S.P., Grice, G.L., and Nathan, J.A. (2017). The vacuolar-ATPase complex  
909 and assembly factors, TMEM199 and CCDC115, control HIF1alpha prolyl hydroxylation by  
910 regulating cellular iron levels. *Elife* 6.

911 Mishra, T., Sreepadmanabh, M., Ramdas, P., Sahu, A.K., Kumar, A., and Chande, A. (2021).  
912 SARS CoV-2 nucleoprotein enhances the infectivity of lentiviral spike particles. *bioRxiv*,  
913 2021.2002.2011.430757.

914 Mlcochova, P., Collier, D., Ritchie, A., Assennato, S.M., Hosmillo, M., Goel, N., Meng, B.,  
915 Chatterjee, K., Mendoza, V., Temperton, N., *et al.* (2020). Combined Point-of-Care Nucleic  
916 Acid and Antibody Testing for SARS-CoV-2 following Emergence of D614G Spike Variant.  
917 *Cell Rep Med* 1, 100099.

918 Nie, J., Li, Q., Wu, J., Zhao, C., Hao, H., Liu, H., Zhang, L., Nie, L., Qin, H., Wang, M., *et al.*  
919 (2020). Quantification of SARS-CoV-2 neutralizing antibody by a pseudotyped virus-based  
920 assay. *Nat Protoc* 15, 3699-3715.

921 O'Brien, A., Chen, D.Y., Hackbart, M., Close, B.J., O'Brien, T.E., Saeed, M., and Baker, S.C.  
922 (2021). Detecting SARS-CoV-2 3CLpro expression and activity using a polyclonal antiserum  
923 and a luciferase-based biosensor. *Virology* 556, 73-78.

924 Papa, G., Mallery, D.L., Albecka, A., Welch, L., Cattin-Ortolá, J., Luptak, J., Paul, D.,  
925 McMahan, H.T., Goodfellow, I.G., Carter, A., *et al.* (2020). Furin cleavage of SARS-CoV-2  
926 Spike promotes but is not essential for infection and cell-cell fusion. *bioRxiv*,  
927 2020.2008.2013.243303.

928 Patterson, E.I., Prince, T., Anderson, E.R., Casas-Sanchez, A., Smith, S.L., Cansado-Utrilla,  
929 C., Solomon, T., Griffiths, M.J., Acosta-Serrano, A., Turtle, L., *et al.* (2020). Methods of  
930 Inactivation of SARS-CoV-2 for Downstream Biological Assays. *J Infect Dis* 222, 1462-1467.

931 Pedersen, N.C., Kim, Y., Liu, H., Galasiti Kankanamalage, A.C., Eckstrand, C., Groutas, W.C.,  
932 Bannasch, M., Meadows, J.M., and Chang, K.O. (2018). Efficacy of a 3C-like protease inhibitor

933 in treating various forms of acquired feline infectious peritonitis. *J Feline Med Surg* 20, 378-  
934 392.

935 Phillips, N. (2021). The coronavirus is here to stay - here's what that means. *Nature* 590, 382-  
936 384.

937 Rathnayake, A.D., Zheng, J., Kim, Y., Perera, K.D., Mackin, S., Meyerholz, D.K., Kashipathy,  
938 M.M., Battaile, K.P., Lovell, S., Perlman, S., *et al.* (2020). 3C-like protease inhibitors block  
939 coronavirus replication in vitro and improve survival in MERS-CoV-infected mice. *Sci Transl*  
940 *Med* 12.

941 Rawson, J.M.O., Duchon, A., Nikolaitchik, O.A., Pathak, V.K., and Hu, W.S. (2021).  
942 Development of a Cell-Based Luciferase Complementation Assay for Identification of SARS-  
943 CoV-2 3CL(pro) Inhibitors. *Viruses* 13.

944 Rice, P., Longden, I., and Bleasby, A. (2000). EMBOSS: the European Molecular Biology  
945 Open Software Suite. *Trends Genet* 16, 276-277.

946 Sabariego, R., Picazo, F., Domingo, B., Franco, S., Martinez, M.A., and Llopis, J. (2009).  
947 Fluorescence resonance energy transfer-based assay for characterization of hepatitis C virus  
948 NS3-4A protease activity in live cells. *Antimicrob Agents Chemother* 53, 728-734.

949 Sarzotti-Kelsoe, M., Bailer, R.T., Turk, E., Lin, C.L., Biliska, M., Greene, K.M., Gao, H., Todd,  
950 C.A., Ozaki, D.A., Seaman, M.S., *et al.* (2014). Optimization and validation of the TZM-bl  
951 assay for standardized assessments of neutralizing antibodies against HIV-1. *J Immunol*  
952 *Methods* 409, 131-146.

953 Schneider, T.D., and Stephens, R.M. (1990). Sequence logos: a new way to display  
954 consensus sequences. *Nucleic Acids Res* 18, 6097-6100.

955 Shin, D., Mukherjee, R., Grewe, D., Bojkova, D., Baek, K., Bhattacharya, A., Schulz, L.,  
956 Widera, M., Mehdipour, A.R., Tascher, G., *et al.* (2020). Papain-like protease regulates SARS-  
957 CoV-2 viral spread and innate immunity. *Nature*.

958 Simonis, A., Theobald, S.J., Fatkenheuer, G., Rybniker, J., and Malin, J.J. (2021). A  
959 comparative analysis of remdesivir and other repurposed antivirals against SARS-CoV-2.  
960 *EMBO Mol Med* 13, e13105.



961 Stewart, S.A., Dykxhoorn, D.M., Palliser, D., Mizuno, H., Yu, E.Y., An, D.S., Sabatini, D.M.,  
962 Chen, I.S., Hahn, W.C., Sharp, P.A., *et al.* (2003). Lentivirus-delivered stable gene silencing  
963 by RNAi in primary cells. *RNA* 9, 493-501.

964 Tchasovnikarova, I.A., Timms, R.T., Matheson, N.J., Wals, K., Antrobus, R., Gottgens, B.,  
965 Dougan, G., Dawson, M.A., and Lehner, P.J. (2015). GENE SILENCING. Epigenetic silencing  
966 by the HUSH complex mediates position-effect variegation in human cells. *Science* 348, 1481-  
967 1485.

968 To, T.L., Piggott, B.J., Makhijani, K., Yu, D., Jan, Y.N., and Shu, X. (2015). Rationally designed  
969 fluorogenic protease reporter visualizes spatiotemporal dynamics of apoptosis in vivo. *Proc*  
970 *Natl Acad Sci U S A* 112, 3338-3343.

971 V'Kovski, P., Kratzel, A., Steiner, S., Stalder, H., and Thiel, V. (2020). Coronavirus biology and  
972 replication: implications for SARS-CoV-2. *Nat Rev Microbiol.*

973 van den Boomen, D.J.H., Sienkiewicz, A., Berlin, I., Jongasma, M.L.M., van Elsland, D.M.,  
974 Luzio, J.P., Neefjes, J.J.C., and Lehner, P.J. (2020). A trimeric Rab7 GEF controls NPC1-  
975 dependent lysosomal cholesterol export. *Nat Commun* 11, 5559.

976 Vuong, W., Khan, M.B., Fischer, C., Arutyunova, E., Lamer, T., Shields, J., Saffran, H.A.,  
977 McKay, R.T., van Belkum, M.J., Joyce, M.A., *et al.* (2020). Feline coronavirus drug inhibits the  
978 main protease of SARS-CoV-2 and blocks virus replication. *Nat Commun* 11, 4282.

979 Walensky, R.P., Walke, H.T., and Fauci, A.S. (2021). SARS-CoV-2 Variants of Concern in the  
980 United States-Challenges and Opportunities. *JAMA.*

981 Wang, M., Cao, R., Zhang, L., Yang, X., Liu, J., Xu, M., Shi, Z., Hu, Z., Zhong, W., and Xiao,  
982 G. (2020). Remdesivir and chloroquine effectively inhibit the recently emerged novel  
983 coronavirus (2019-nCoV) in vitro. *Cell Res* 30, 269-271.

984 Wei, X., Decker, J.M., Liu, H., Zhang, Z., Arani, R.B., Kilby, J.M., Saag, M.S., Wu, X., Shaw,  
985 G.M., and Kappes, J.C. (2002). Emergence of resistant human immunodeficiency virus type  
986 1 in patients receiving fusion inhibitor (T-20) monotherapy. *Antimicrob Agents Chemother* 46,  
987 1896-1905.

988 WHO, S.T.C. (2020). Repurposed Antiviral Drugs for Covid-19 — Interim WHO Solidarity Trial  
989 Results. *New England Journal of Medicine* 384, 497-511.

990 Wigdal, S.S., Anderson, J.L., Vidugiris, G.J., Shultz, J., Wood, K.V., and Fan, F. (2008). A  
991 novel bioluminescent protease assay using engineered firefly luciferase. *Curr Chem*  
992 *Genomics* 2, 16-28.

993 Williams, T.C., and Burgers, W.A. (2021). SARS-CoV-2 evolution and vaccines: cause for  
994 concern? *Lancet Respir Med*.

995 Xie, X., Muruato, A., Lokugamage, K.G., Narayanan, K., Zhang, X., Zou, J., Liu, J.,  
996 Schindewolf, C., Bopp, N.E., Aguilar, P.V., *et al.* (2020a). An Infectious cDNA Clone of SARS-  
997 CoV-2. *Cell Host Microbe* 27, 841-848 e843.

998 Xie, X., Muruato, A.E., Zhang, X., Lokugamage, K.G., Fontes-Garfias, C.R., Zou, J., Liu, J.,  
999 Ren, P., Balakrishnan, M., Cihlar, T., *et al.* (2020b). A nanoluciferase SARS-CoV-2 for rapid  
1000 neutralization testing and screening of anti-infective drugs for COVID-19. *Nat Commun* 11,  
1001 5214.

1002 Yan, S., and Wu, G. (2021). Spatial and temporal roles of SARS-CoV PL(pro) -A snapshot.  
1003 *FASEB J* 35, e21197.

1004 Zhang, Q., Schepis, A., Huang, H., Yang, J., Ma, W., Torra, J., Zhang, S.Q., Yang, L., Wu, H.,  
1005 Nonell, S., *et al.* (2019). Designing a Green Fluorogenic Protease Reporter by Flipping a Beta  
1006 Strand of GFP for Imaging Apoptosis in Animals. *J Am Chem Soc* 141, 4526-4530.

1007

A

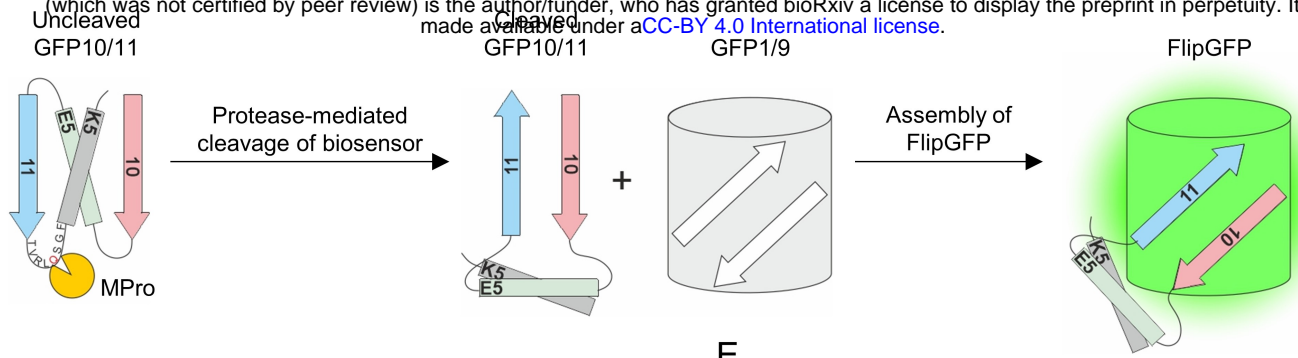

B

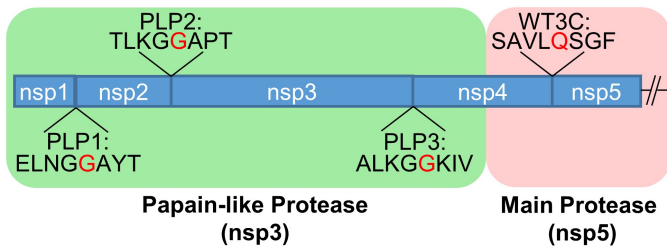

C

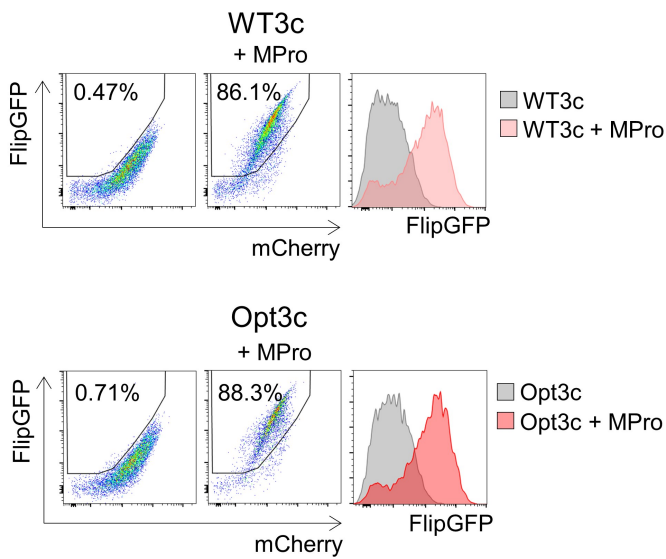

E

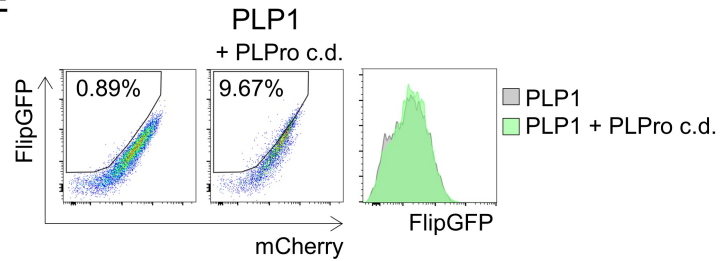

D

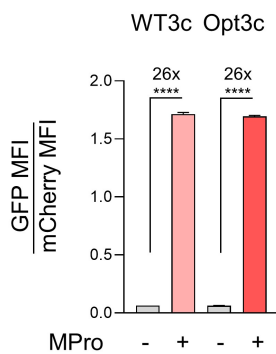

F

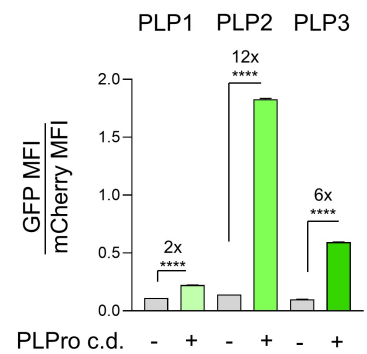

G

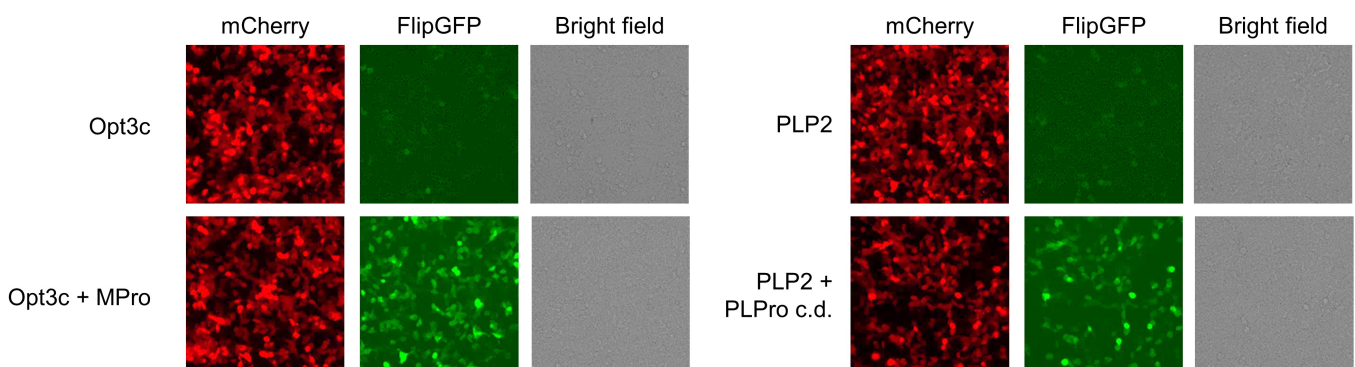

Figure 1

**A**

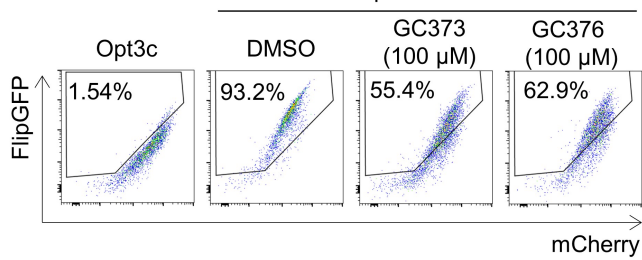

**B**

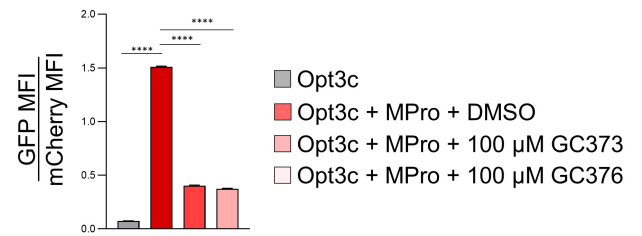

**C**

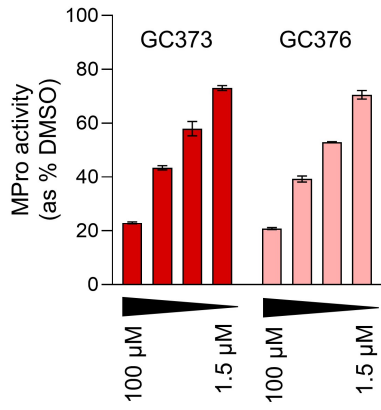

**D**

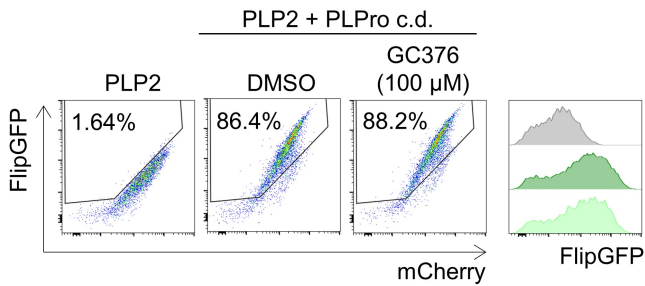

**E**

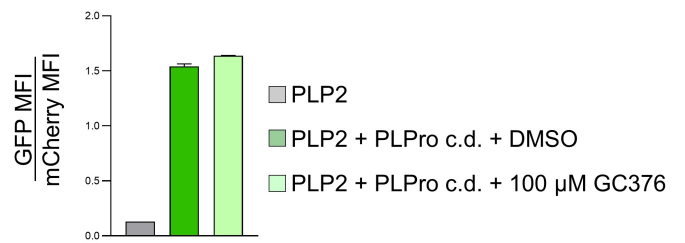

**F**

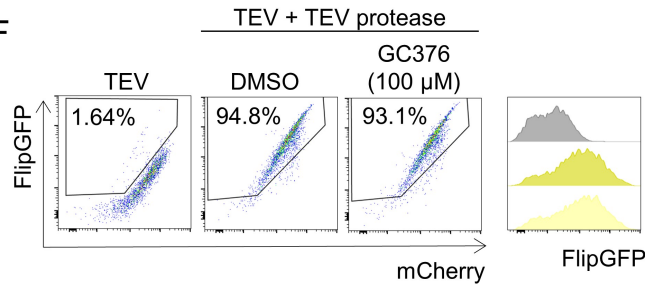

**G**

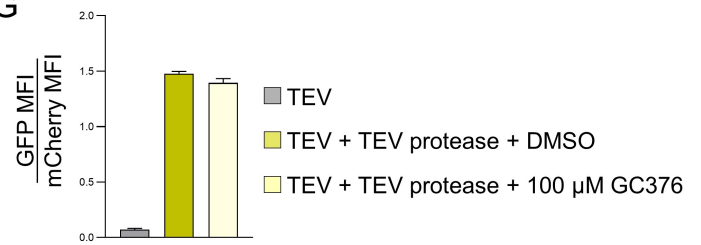

A

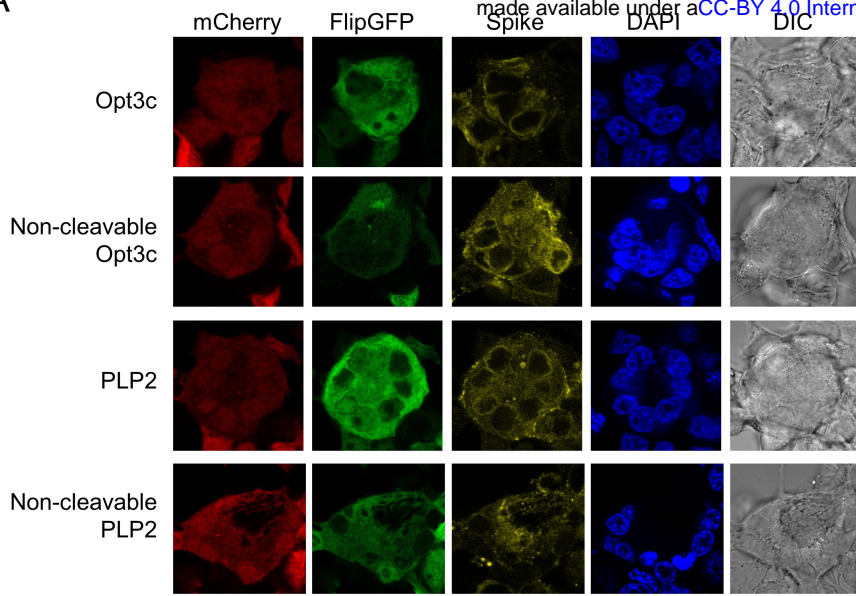

B

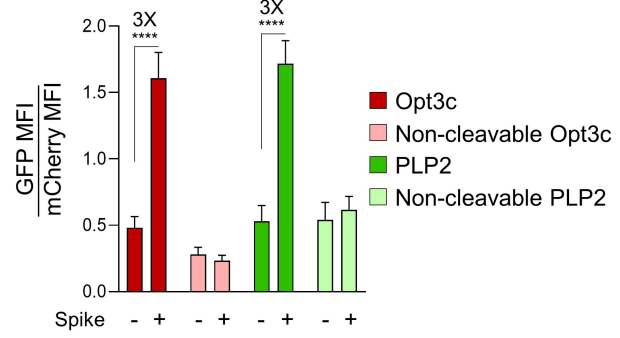

C

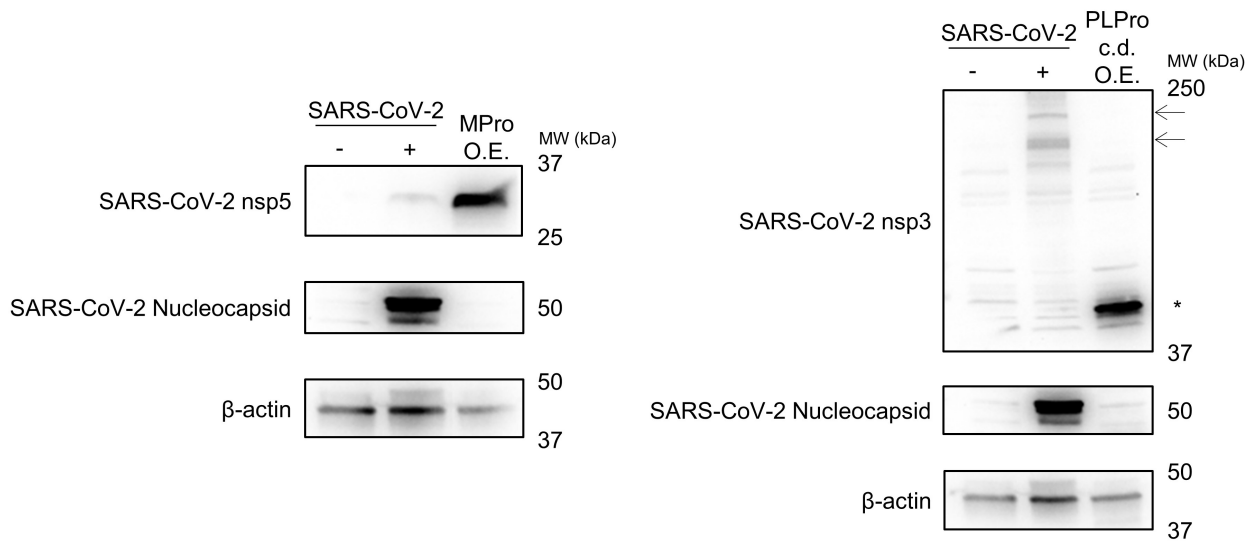

A

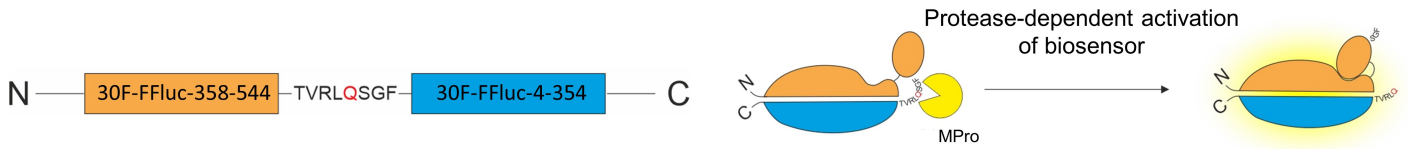

B

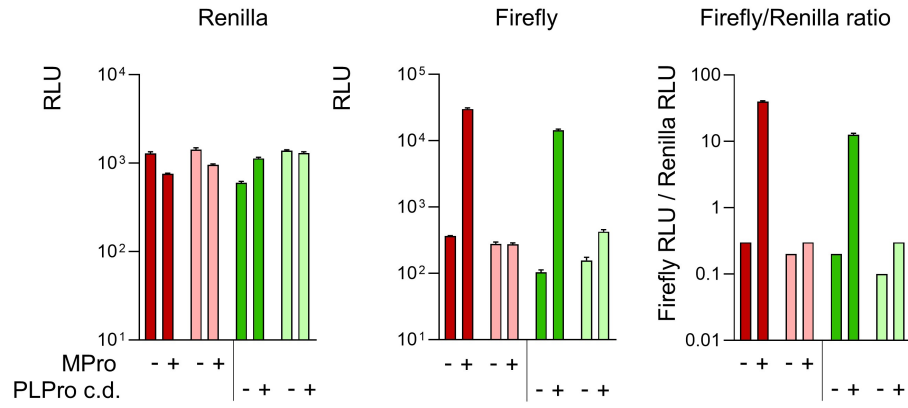

C

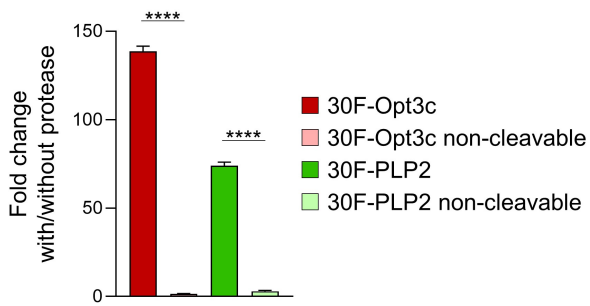

D

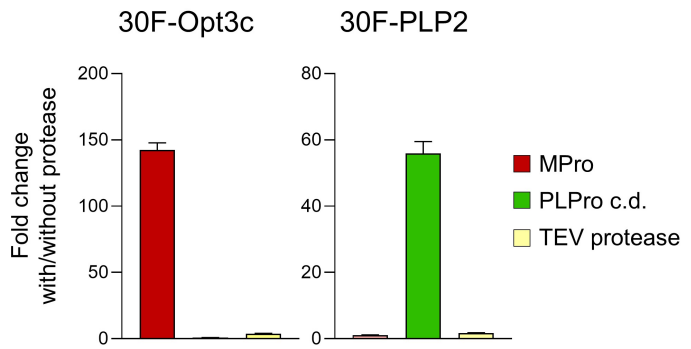



A

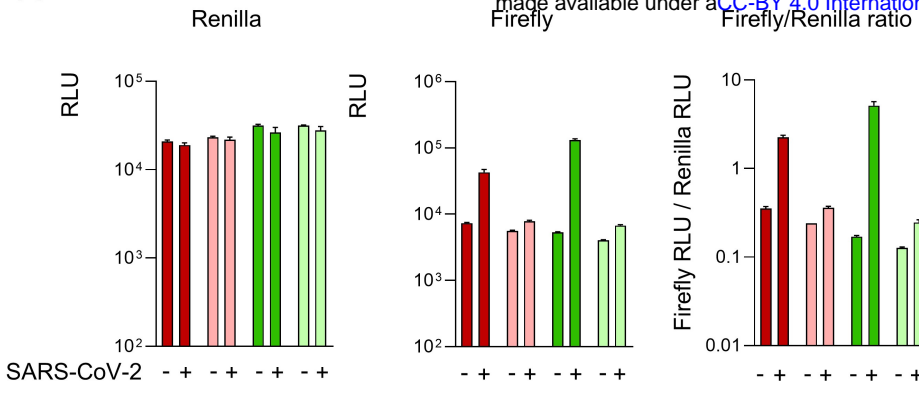

B

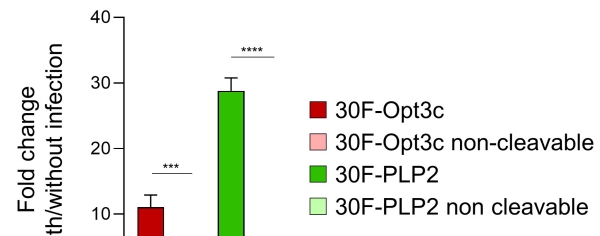

C

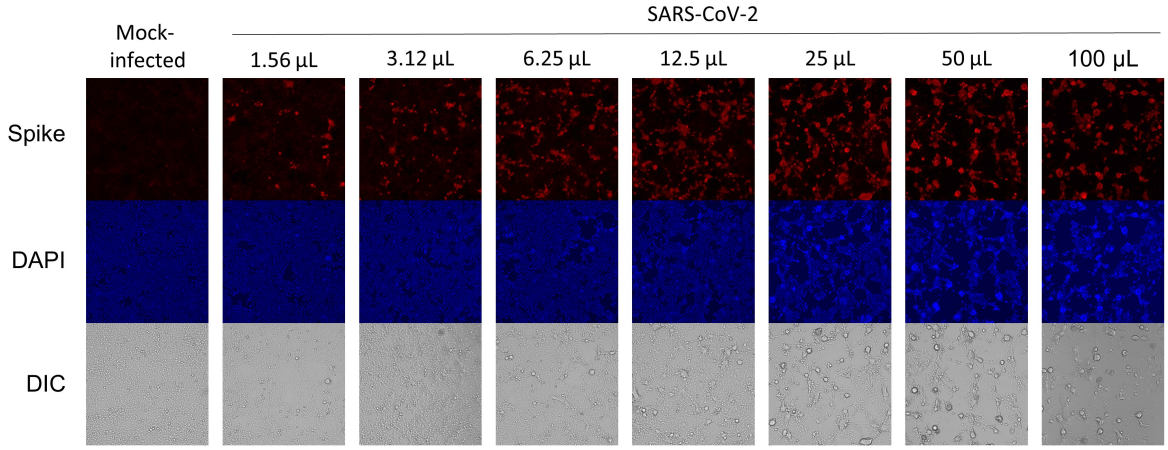

D

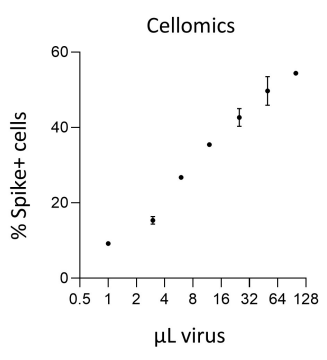

E

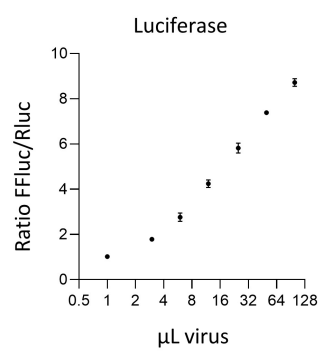

F

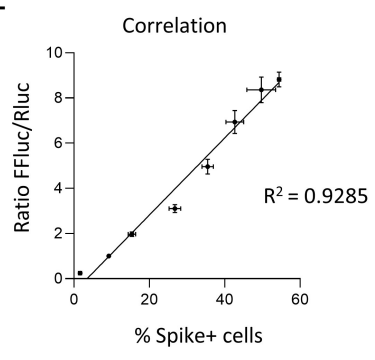

Figure 5

A

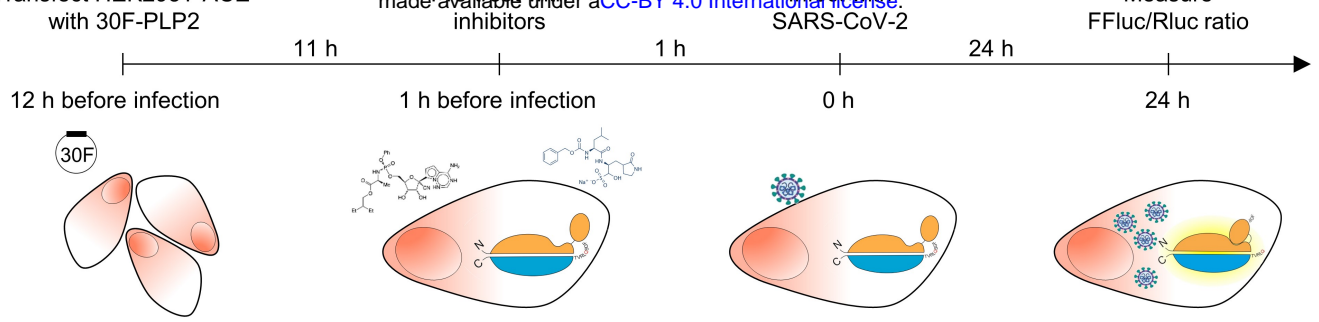

B

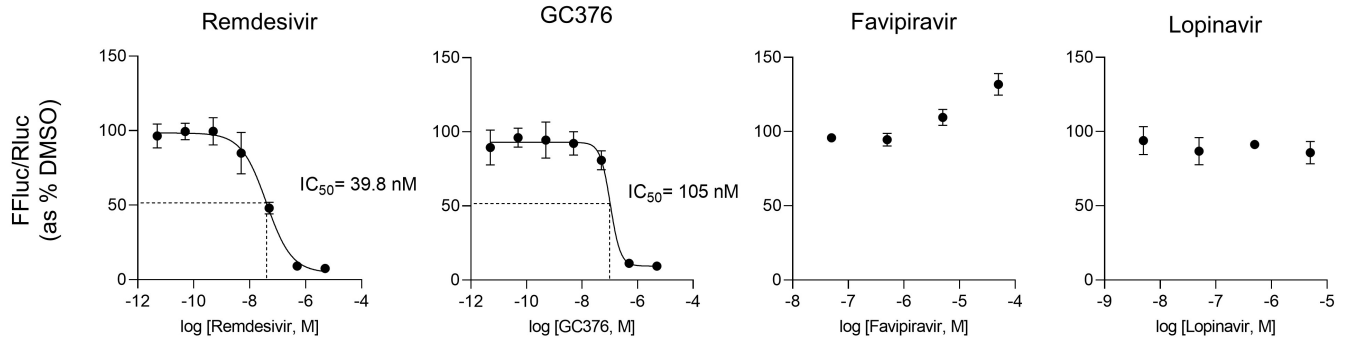

Figure 6



A

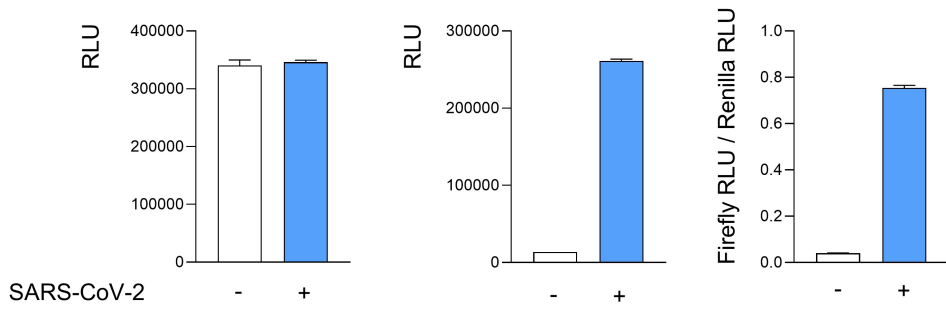

B

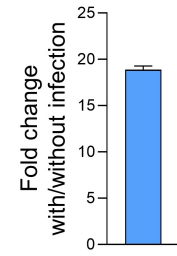

C

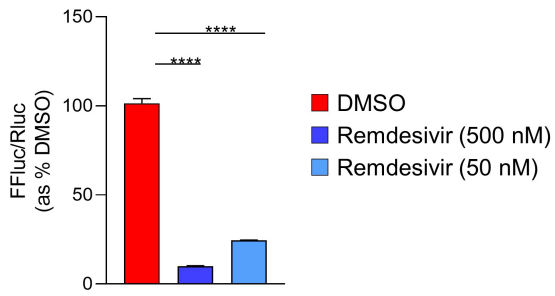

D

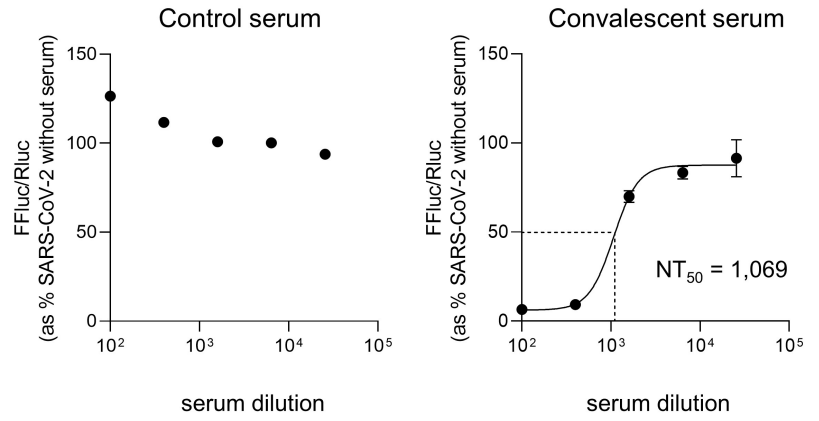

A

bioRxiv preprint doi: <https://doi.org/10.1101/2021.03.22.435957>; this version posted March 22, 2021. The copyright holder for this preprint (which was not certified by peer review) is the author/funder, who has granted bioRxiv a license to display the preprint in perpetuity. It is made available under aCC-BY 4.0 International license.

PLP1

PLP2

PLP3

WT3C

gisaid

gisaid

gisaid

gisaid

SARS-CoV-2  
(n = 50387)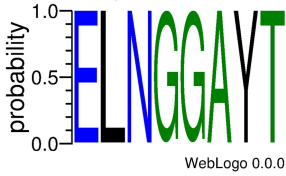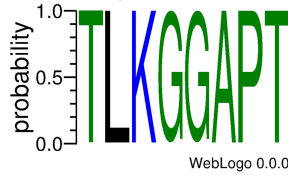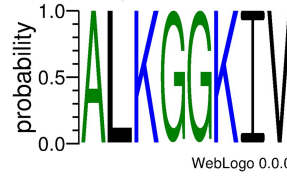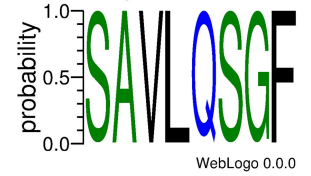SARS-CoV  
(n = 15930)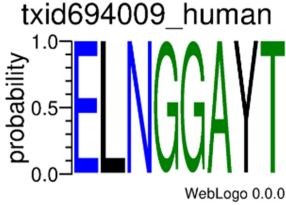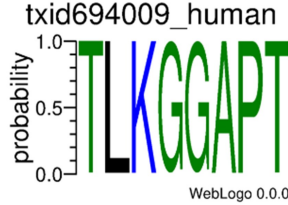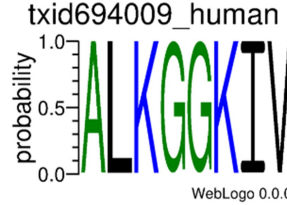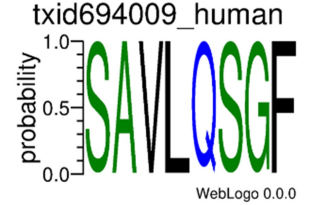MERS-CoV  
(n = 258)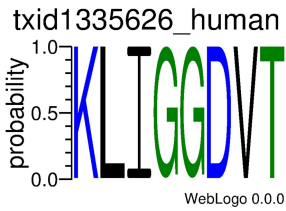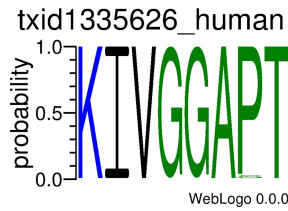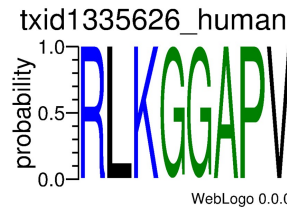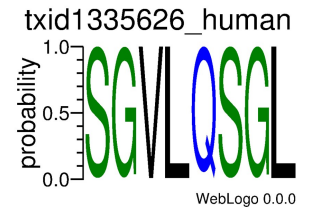

B

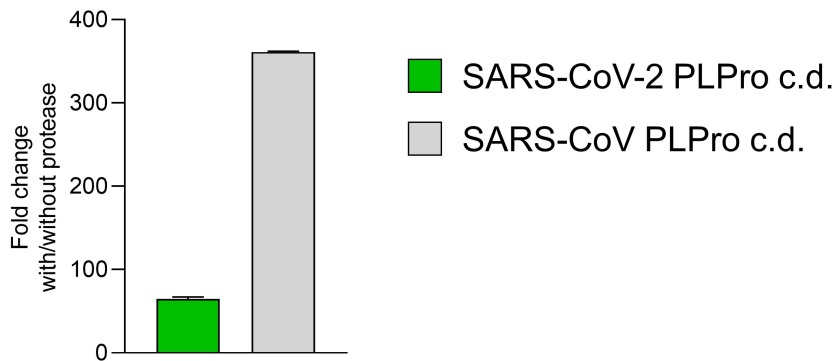

A

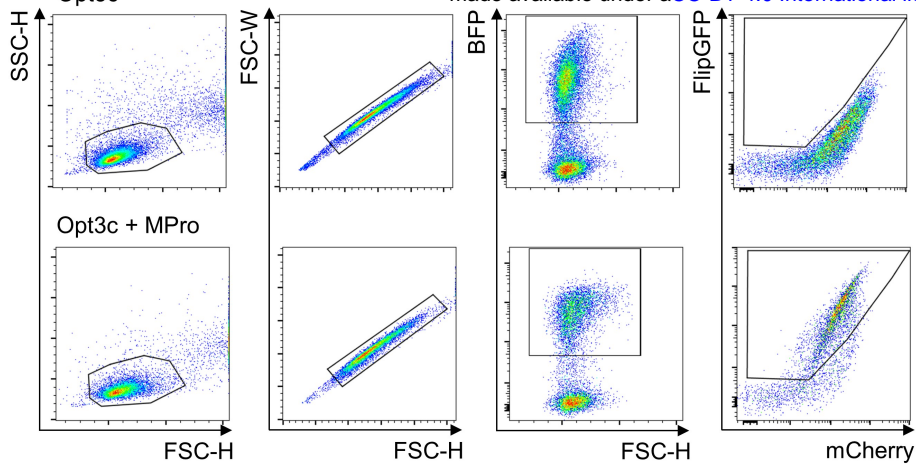

B

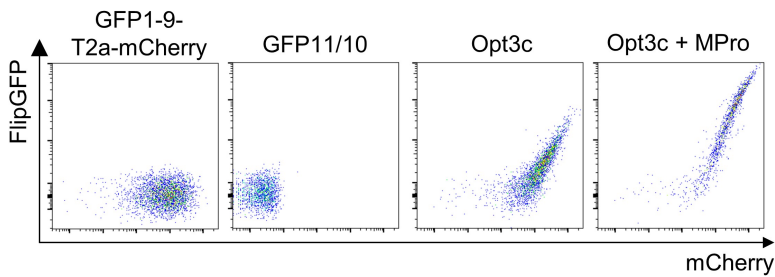

C

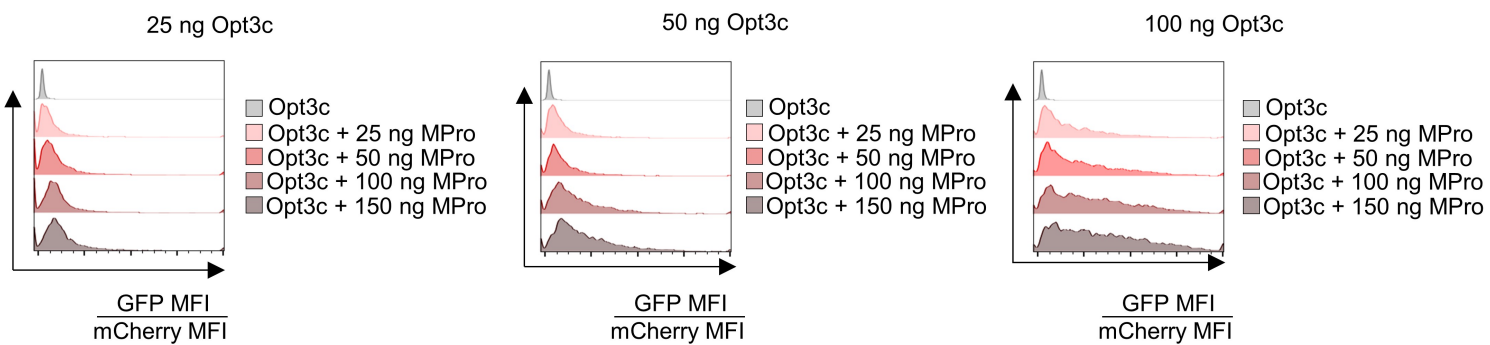

D

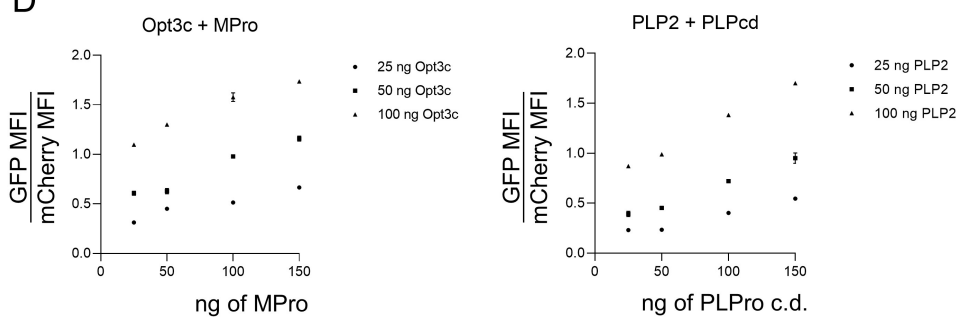

E

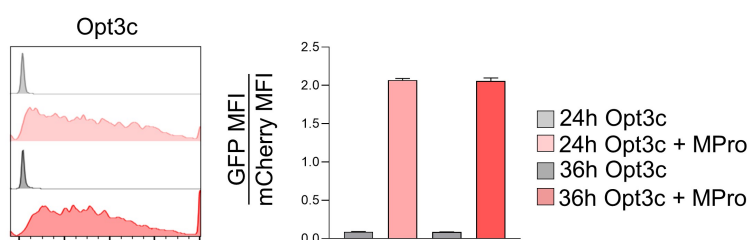

Figure 1 – figure supplement 2

### A Opt3c

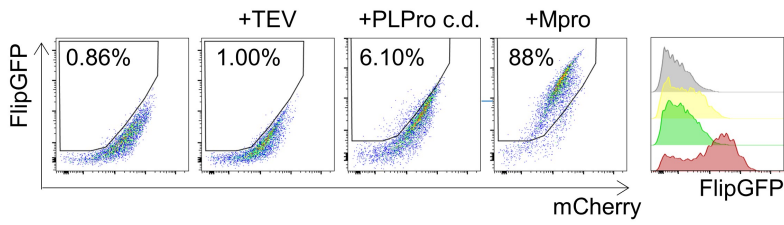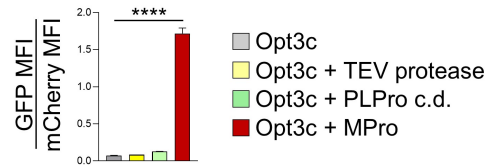

### PLP2

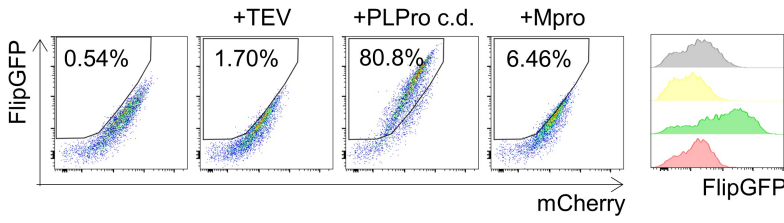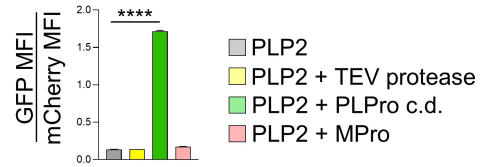

### TEV

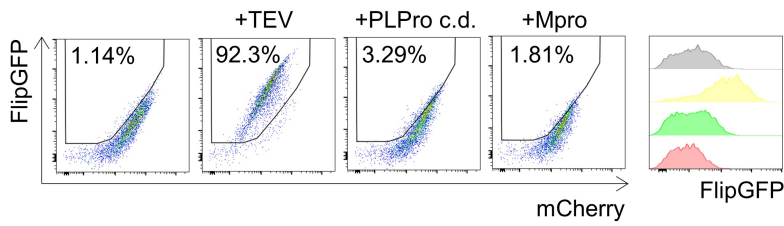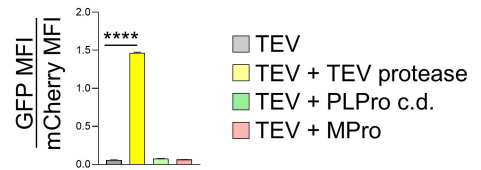

### C

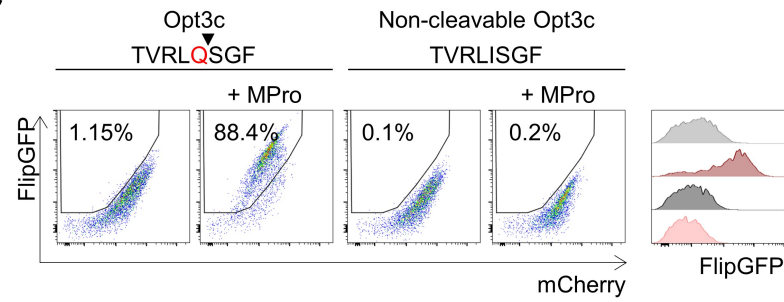

### D

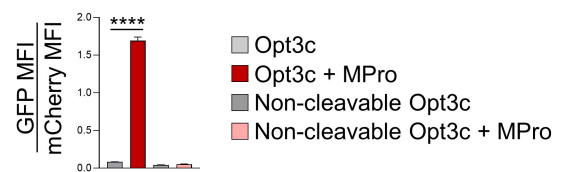

### E

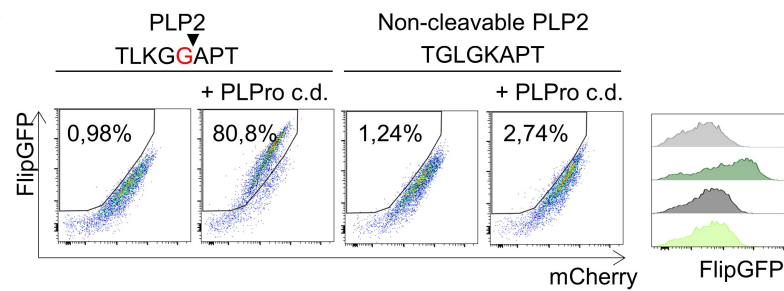

### F

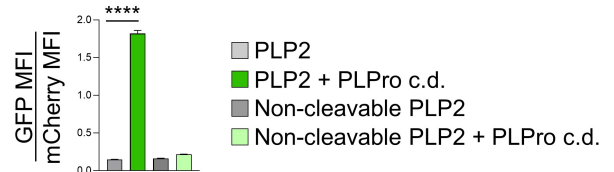

**A**

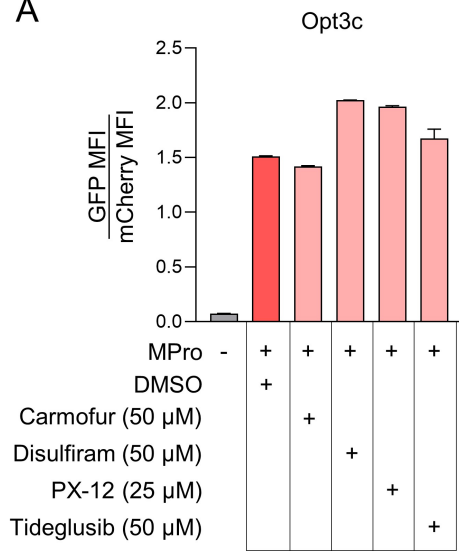

**B**

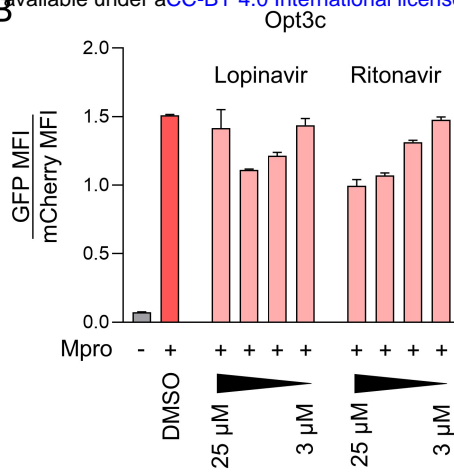

**C**

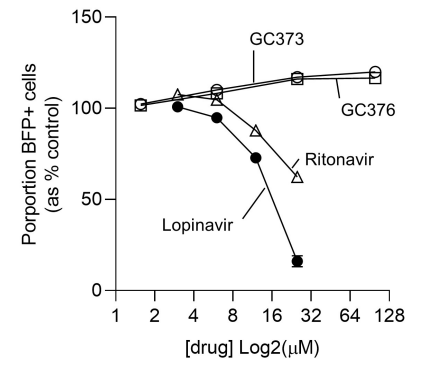

A

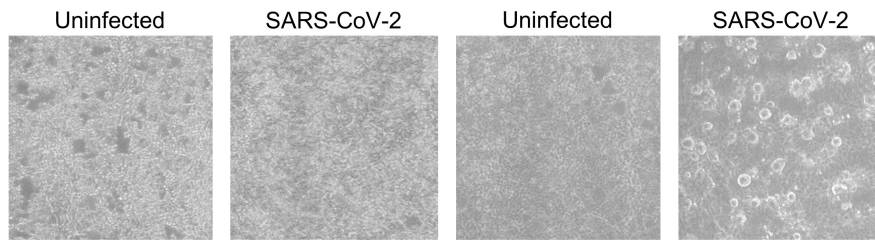

B

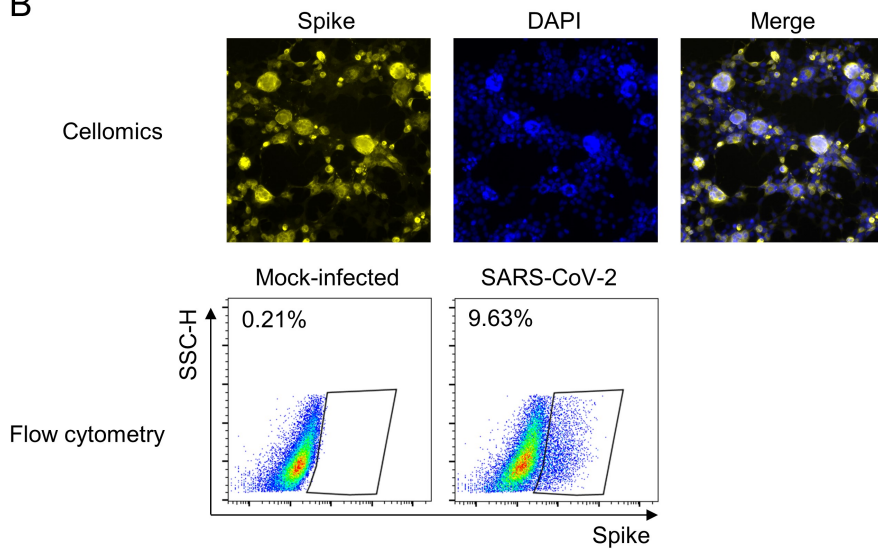

C

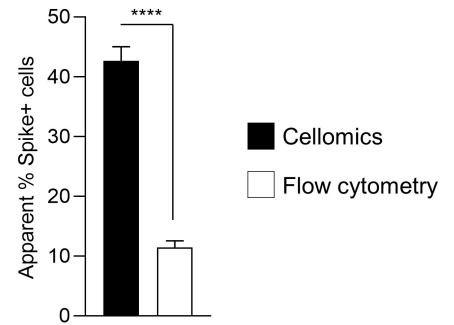

A

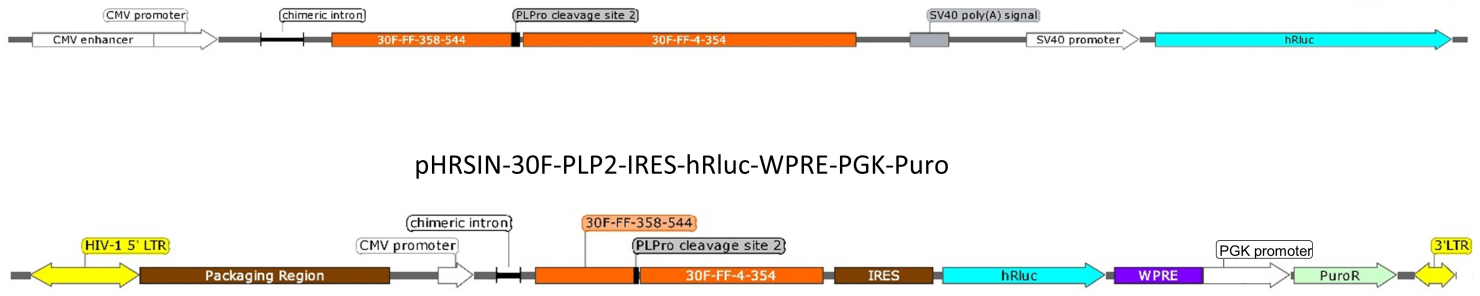

Source: https://biorxiv.org/content/10.1101/2021.03.22.435957v1.full.pdf
